# Supplementary material for: Summertime observations of ultrafine particles and cloudcondensation nuclei from the boundary layer to the free tropospherein the Arctic
Source: Copernicus journal article supplement (doi:10.5194/acp-2016-701), 2016-08-08
Supplement: Supplementary file 1 [file acp-2016-701-supplement.pdf]

1 **Supplemental Material**

2

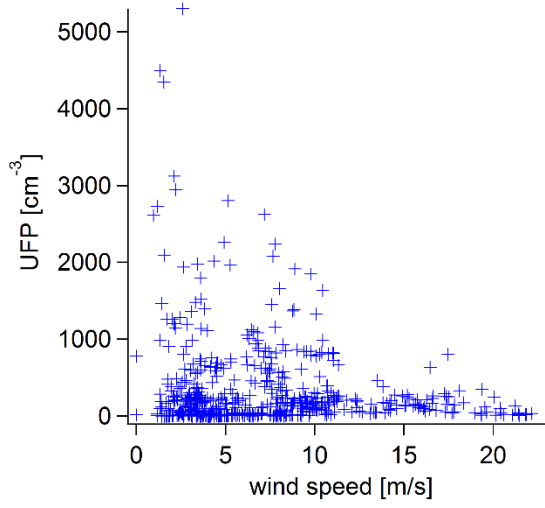

3  
4  
5  
6

S Figure 1. UFP vs wind speed within the BL for the entire campaign.

7  
8  
9

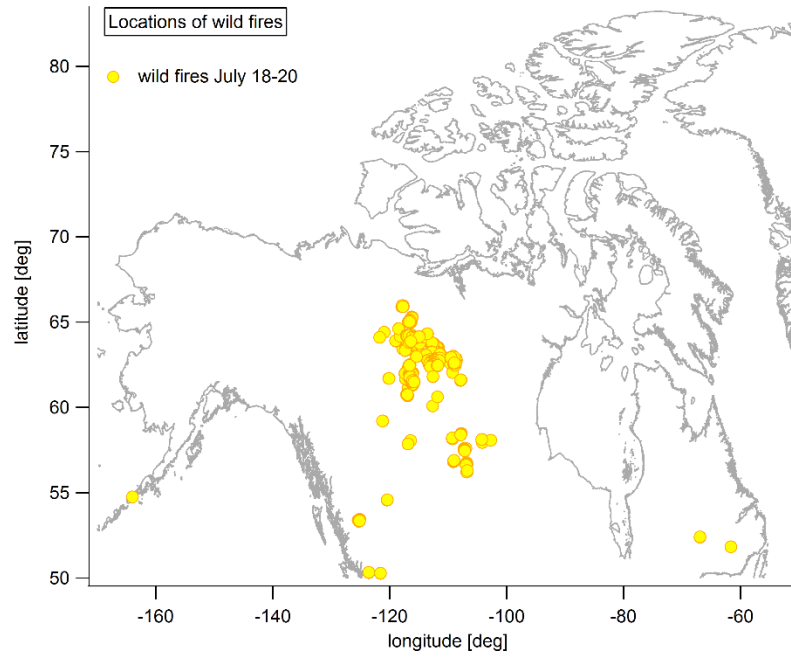

10  
11  
12  
13  
14

S Figure 2. Location of wild fires relevant to the southern air mass period. The data is obtained from the NASA databank (MODIS Active Fire Detections extracted from [MCD14ML](https://earthdata.nasa.gov/active-fire-data) distributed by NASA FIRMS, available online: <https://earthdata.nasa.gov/active-fire-data>).

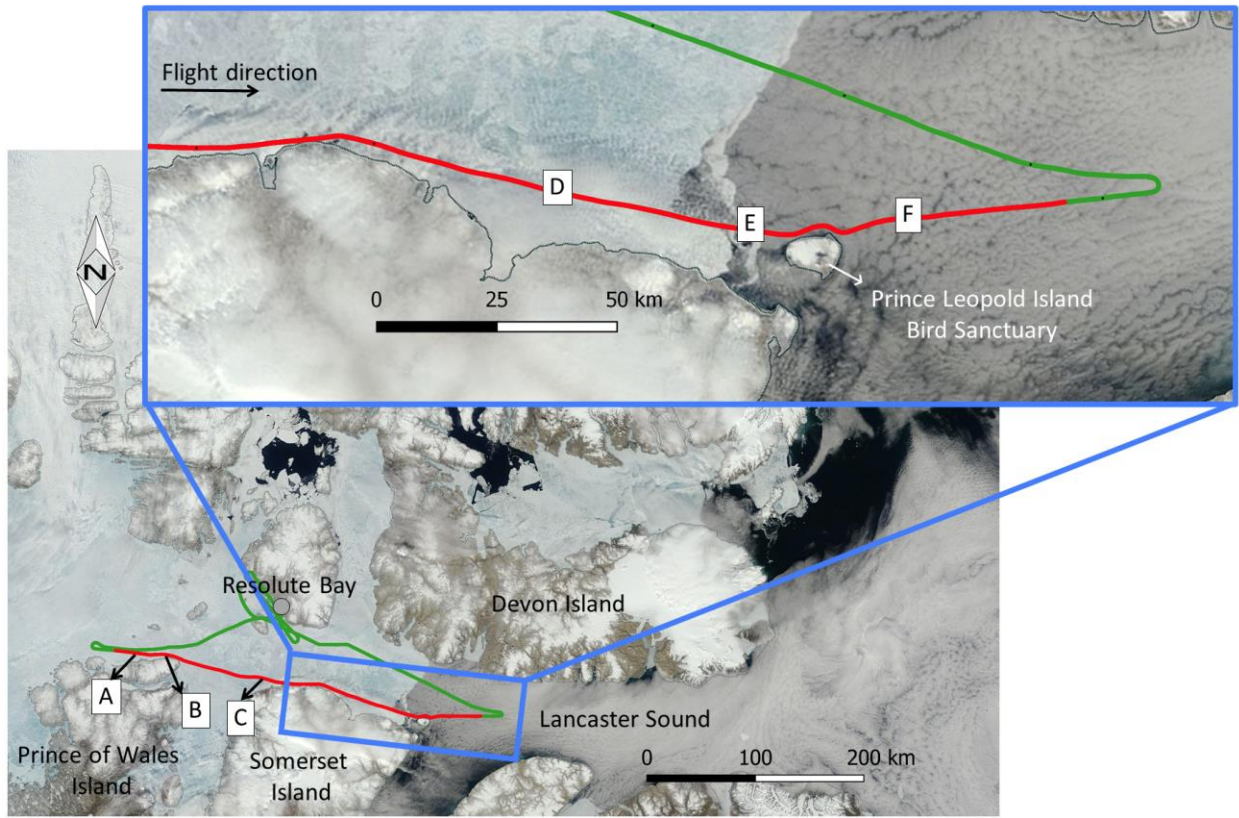

16  
17

18 S Figure 3. Flight track of the case study on July 8. The flight track highlighted in red corresponds  
 19 to the part of the flight discussed in the case study. The five locations (B)-(F) are located within  
 20 the BL and air mass histories are discussed in detail. At location (A) the aircraft was still above  
 21 the BL. The enlarged area shows the section where cloud patches started to reach the ice (also  
 22 visible on the satellite picture) and the locations where highest concentrations of UFP were  
 23 observed: (D) in cloud vicinity and (E) around the ice edge.

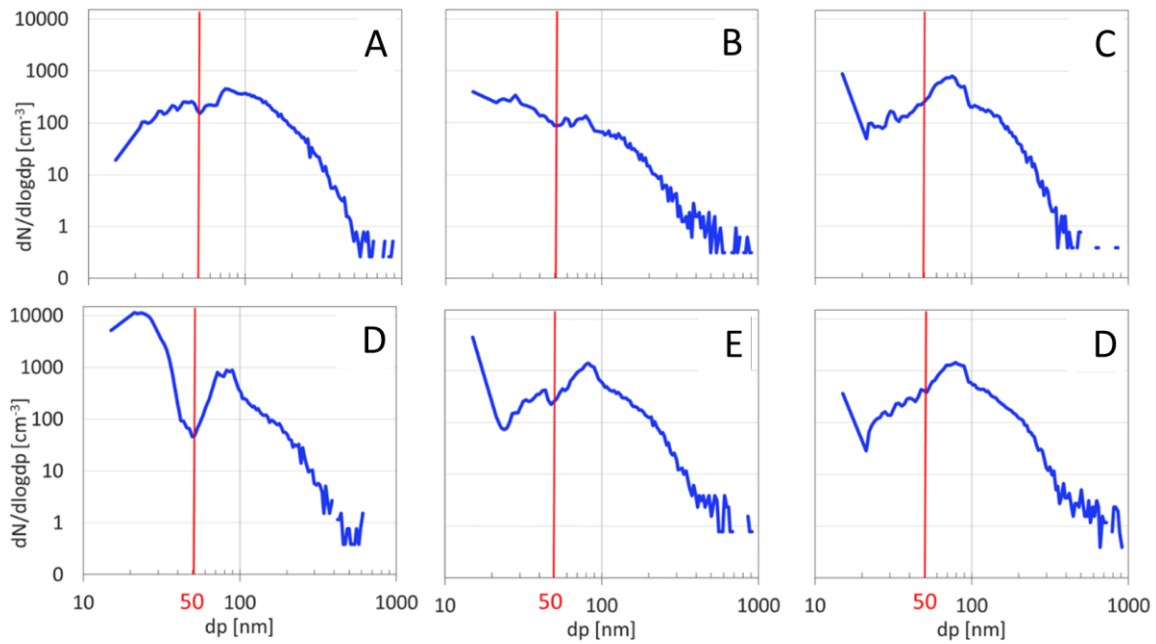

24  
25

26 S Figure 4. Size distributions at locations i-vi. Above the BL a mode of UFP is missing (A). The  
27 most pronounced mode of UFP was observed above cloud (D). At this time increased particle  
28 concentrations extend almost up to 50nm suggesting particle nucleation with subsequent growth.

29  
30  
31  
32  
33  
34  
35  
36

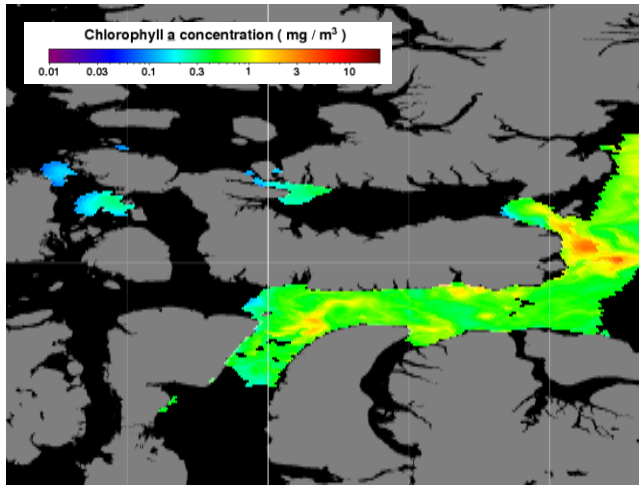

37 S Figure 5: Chlorophyll a concentrations on July 5<sup>th</sup> 2014 estimated from satellite measurements  
38 (Visible and Infrared Imager/Radiometer Suite) by NASA  
39 (<http://oceancolor.gsfc.nasa.gov/cgi/l3>).
