# Supplementary material for: Summertime observations of ultrafine particles and cloudcondensation nuclei from the boundary layer to the free tropospherein the Arctic
Source: Copernicus journal article supplement (doi:10.5194/acp-2016-701), 2016-08-08
Supplement: Supplementary file [file acp-2016-701-AC4-supplement.pdf]

1 Revised Manuscript - January 15<sup>th</sup>, 2017

2 Changes are highlighted in yellow.

3

4 **Summertime observations of elevated levels of ultrafine**  
5 **particles in the high Arctic marine boundary layer**

6 **Julia Burkart<sup>1</sup>, Megan D. Willis<sup>1</sup>, Heiko Bozem<sup>2</sup>, Jennie L. Thomas<sup>3</sup>, Kathy Law<sup>3</sup>,**  
7 **Peter Hoor<sup>2</sup>, Amir A. Aliabadi<sup>4</sup>, Franziska Köllner<sup>5</sup>, Johannes Schneider<sup>5</sup>, Andreas**  
8 **Herber<sup>6</sup>, Jonathan P. D. Abbatt<sup>1</sup>, W. Richard Leitch<sup>7</sup>.**

9 [1] {Department of Chemistry, University of Toronto, Toronto, Canada}

10 [2] {Institute of Atmospheric Physics, Johannes Gutenberg-University, Mainz, Germany}

11 [3] {LATMOS/IPSL, UPMC Univ. Paris 06 Sorbonne Universités, UVSQ, CNRS, Paris,  
12 France}

13 [4] {Environmental Engineering Program, University of Guelph, Guelph, Canada}

14 [5] {Particle Chemistry Department, Max Planck Institute for Chemistry, Mainz, Germany}

15 [6] {Alfred Wegener Institute, Helmholtz Center for Polar and Marine Research, Bremerhaven,  
16 Germany}

17 [7] {Environment and Climate Change Canada, Toronto, Ontario, Canada}

18

19 Correspondence to: J. Burkart (jburkart@chem.utoronto.ca)

20

21 **Abstract**

22 **Motivated by increasing levels of open ocean in the Arctic summer and the lack of prior**  
23 **altitude-resolved studies, extensive aerosol measurements were made during 11 flights of the**  
24 **NETCARE July 2014 airborne campaign from Resolute Bay, Nunavut. Flights included vertical**  
25 **profiles (60 to 3000 m above ground level) over open ocean, fast ice, and boundary layer clouds**  
26 **and fogs. A general conclusion, from observations of particle numbers between 5 and 20 nm in**

27 diameter ( $N_{5-20}$ ), is that ultrafine particle formation occurs readily in the Canadian high Arctic  
28 marine boundary layer, especially just above ocean and clouds, reaching values of a few  
29 thousand particles/cm<sup>3</sup>. By contrast ultrafine particle concentrations are very much lower in the  
30 free troposphere. Elevated levels of larger particles (for example, from 20 to 40 nm in size,  $N_{20-}$   
31  $_{40}$ ) are sometimes associated with high  $N_{5-20}$ , especially over low clouds, suggestive of aerosol  
32 growth. The number densities of particles greater than 40 nm in diameter ( $N_{>40}$ ) are relatively  
33 depleted at the lowest altitudes, indicative of depositional processes that will lower the  
34 condensation sink and promote new particle formation. The number of cloud condensation nuclei  
35 (CCN, measured at 0.6% supersaturation) are positively correlated with the numbers of small  
36 particles (down to roughly 30 nm), indicating that some fraction of these newly formed particles  
37 are capable of being involved in cloud activation. Given that the summertime marine Arctic is a  
38 biologically active region, it is important to better establish the links between emissions from the  
39 ocean and the formation and growth of ultrafine particles within this rapidly changing  
40 environment.

41

## 42 **1 Introduction**

43 Surface temperatures within the Arctic are rising almost twice as fast as in any other region of  
44 the world. As a manifestation of this rapid change the summer sea ice extent has been retreating  
45 dramatically over the past decades with the possibility that the Arctic might be ice free by the  
46 end of this century (Boé et al., 2009) or even earlier (Wang and Overland, 2012). Arctic aerosol  
47 is well known to show a distinct seasonal variation with maximum mass concentrations and a  
48 strong long-range anthropogenic influence in winter and early spring. The phenomenon, known  
49 as Arctic Haze, was identified many years ago (e.g. Barrie, 1986; Heintzenberg, 1980; Rahn et  
50 al., 1977; Shaw, 1995), and has commanded renewed attention in recent years (e.g. Law et al.,  
51 2014; Quinn et al., 2007). During summer the Arctic is more isolated from remote anthropogenic  
52 sources and represents a comparatively pristine environment. The reason is that the Arctic front  
53 (e.g. Barrie, 1986), which provides a meteorological barrier for lower-level air mass exchange,  
54 moves north of many source regions during the summer months. Anthropogenic and biomass  
55 burning aerosols are transported to the Arctic during the summer, but increased aerosol  
56 scavenging helps maintain the pristine conditions near the surface (e.g. Browse et al., 2012; Croft  
57 et al., 2016a; Garrett et al., 2011).

58 Zhang et al. (2010) discuss the impacts of declining sea ice on the marine planktonic ecosystem,  
59 which includes increasing emissions of dimethyl sulfide (DMS) that may contribute to particle  
60 formation in the atmosphere (e.g. Charlson et al., 1987; Pirjola et al., 2000). Enhanced secondary  
61 organic aerosol from emissions of biogenic volatile organic compounds is also a possibility (Fu  
62 et al., 2009). Primary emissions of aerosol particles from the ocean, such as sea salt and marine  
63 primary organic aerosol, may also increase (Browse et al., 2014). Open water tends to increase

64 cloudiness, which means that aerosol influences on clouds are likely to be more important. Over  
65 the Arctic the effects of aerosols on clouds are especially uncertain. Models have predicted that  
66 increasing numbers of particles may lead to overall warming (Garrett, 2004) when the  
67 atmosphere exists in a particularly low particle number state now referred to being "CCN  
68 limited" (Mauritsen et al., 2011), to an overall cooling effect when increasing numbers of  
69 particles are added to an atmosphere with more particles already present (Lohmann and Feichter,  
70 2005; Twomey, 1974). It is important to characterize particle size distributions in this pristine  
71 environment to provide a baseline against which future measurements can be compared in a  
72 warming world. Indeed, Carslaw et al. (2013) highlight the need to understand pre-industrial-like  
73 environments with only natural aerosols in order to reduce the uncertainty in estimations of the  
74 anthropogenic aerosol radiative forcing.

75 Primary sources, gas-to-particle formation processes, cloud processing, atmospheric aging,  
76 mixing and deposition are all reflected in the size distribution. Therefore, measurements of  
77 aerosol size distributions are important for understanding the processes particles undergo in  
78 addition to their potential effects on clouds. The presence of ultrafine particles indicates recent  
79 production as their lifetime is on the order of hours. We focus this paper on ultrafine particles as  
80 these are an indication for in-situ aerosol production processes in the Arctic. We also consider  
81 the growth of newly formed particles, as that determines how important they are for climate.

82 Aerosol size distributions including ultrafine particles ( $dp < 20$  nm) have been measured before  
83 at different locations throughout the Arctic. Long term studies at ground stations such as Alert,  
84 Nunavut (Leaith et al., 2013), Ny Alesund and Zeppelin (Engvall et al., 2007; Ström et al.,  
85 2003, 2009; Tunved et al., 2013), both on Svalbard and very recently in Tiksi, Russia (Asmi et  
86 al., 2016) and Station Nord, Greenland (Nguyen et al., 2016) indicate a strong seasonal  
87 dependence of the size distribution with the accumulation mode aerosol dominating during the  
88 winter months and a shift to smaller particles during the summer months. New particle formation  
89 events are frequently observed from June to August. Ström et al. (2003) show that the size  
90 distribution undergoes a rapid change from an accumulation mode dominated distribution during  
91 the winter months to an Aitken mode dominated distribution at the beginning of summer. Total  
92 number concentrations increase at the beginning of summer and roughly follow the incoming  
93 solar radiation on a seasonal scale suggesting that photochemistry is an important factor for new  
94 particle formation in the Arctic. At Ny Alesund maximum number concentrations occur in late  
95 summer and are explained by the Siberian tundra being a potential source of aerosol precursor  
96 gases (Ström et al., 2003) and **marine biogenic sulphur (Heintzenberg and Leck, 1994)**. Analysis  
97 of air mass patterns for this region show that the shift in the size distributions is also  
98 accompanied by a change of source areas, with a dominance of Eurasian source areas in winter  
99 and North Atlantic air during summer (Tunved et al., 2013).

100 Particle measurements including aerosol size distributions were also conducted from ice breaker  
101 cruises such as from the Swedish ice breaker Oden (Bigg and Leck, 2001; Covert et al., 1996;

102 Heintzenberg and Leck, 2012; Leck and Bigg, 2005; Tjernström et al., 2014) and the Canadian  
103 Coast Guard Ship ice breaker Amundsen (e.g. Chang et al., 2011). Chang et al. (2011) used  
104 model calculations to show that the appearance of ultrafine particles can be explained by  
105 nucleation and growth attributed to the presence of high atmospheric and oceanic DMS  
106 concentrations measured at the same time. The Oden expeditions focus on the pack-ice-covered  
107 high Arctic, mainly north of 80N and also confirm the frequent presence of an UFP mode (e.g.  
108 Covert et al., 1996). The observations from the Oden cruises offer evidence that UFP in the inner  
109 Arctic might originate from primary sources (e.g. Heintzenberg et al., 2015; Karl et al., 2013).  
110 This is motivated by three main observations. First, a lack of sulfuric acid components in  
111 collected 15-50 nm particles (Leck and Bigg, 1999). Second, Leck and Bigg (2010) highlight  
112 that nucleation events in the high Arctic do not follow the classical banana shaped growth curve  
113 (Kulmala et al., 2001) but enhanced levels of ultrafine particles rather appear simultaneously in  
114 distinct size ranges (Karl et al., 2012). Third, such events could not be modelled with the selected  
115 empirical nucleation mechanism for the extremely low DMS concentrations in this region (Karl  
116 et al., 2013). As a primary source marine microgels are suggested that might become airborne via  
117 the evaporation of fog and cloud droplets (Heintzenberg et al., 2006; Karl et al., 2013).

118 So far most studies that include size distribution measurements in the summertime Arctic were  
119 conducted from ground stations or ship cruises. To date there are only two studies that assess the  
120 altitude dependence of the size distribution:, i.e. one in the area of Svalbard (Engvall et al., 2008)  
121 and one from the Oden performing vertical profiles with a helicopter (Kupiszewski et al., 2013).  
122 Although no size distribution measurements were performed, Heintzenberg et al. (1991)  
123 measured vertical profiles of the total particle number concentration greater than 10 nm during  
124 June and July, 1984 over the Fram Strait-Spitsbergen area, and found a “rather uniform  
125 distribution” with altitude. Their measurements, however, were confined to 500 m-MSL and  
126 above.

127 In this study we present data from aerosol size distribution measurements taken from an aircraft  
128 during a three week period in July 2014 in the high Arctic area of Resolute Bay, Nunavut,  
129 Canada. The flights focused on vertical profiles from as low as 60 m above the ground up to  
130 3km, as well as on low-level flights above different terrain such as fast ice, open ocean, polynyas  
131 and clouds. We focus especially on UFP (5-20 nm in diameter) and address the following  
132 questions: What are the concentrations of UFPs in the Arctic summertime, and what is their  
133 vertical distribution? What are the environmental conditions that favour occurrence of UFPs?  
134 And, is there evidence for growth of UFP to CCN sizes? Aside from the studies conducted near  
135 Svalbard, we believe this is the first aircraft study in the high Arctic to systematically address  
136 these specific questions. This work provides a comprehensive picture of UFPs observed during  
137 the campaign whereas a prior publication from Willis et al., (2016) detailed one UFP formation  
138 and growth event observed over Lancaster Sound.

139

## 140 2 Experimental

### 141 2.1 Sampling Platform Polar 6

142 The research aircraft Polar 6 owned by the Alfred Wegener Institute, Helmholtz Center for Polar  
143 and Marine Research, Bremerhaven, Germany served as the sampling platform. The Polar 6 is a  
144 converted DC-3 airplane (Basler BT-67) modified to work under extreme cold weather  
145 conditions. An advantage of the plane is that flights at very relatively low speeds and altitudes  
146 ( $< 60$  m a.g.l.) are possible. The cabin of the aircraft is non-pressurized. We maintained a  
147 constant survey speed of approximately 120 knots ( $222 \text{ km h}^{-1}$ ) for measurement flights at  
148 constant altitude, and ascent and descent rates of  $150 \text{ m min}^{-1}$  for vertical profiles. Instruments  
149 and measurements specific to this paper are described below.

#### 150 2.1.1 Inlets

151 Aerosol was sampled through a stainless steel inlet mounted to the top of the plane and ahead of  
152 the engines to exclude contamination. The tip of the inlet consisted of a shrouded diffuser that  
153 provided nearly isokinetic flow. Inside the cabin the intake tubing was connected to a stainless  
154 steel tube (outer diameter of 2.5 cm, inner diameter of 2.3 cm) that carried the aerosol to the back  
155 of the aircraft where it was allowed to freely exhaust into the cabin so that the system was not  
156 over-pressured. The stainless steel tube functioned as a manifold, off which angled inserts were  
157 used to connect sample lines to the various instruments described below. In-flight air was pushed  
158 through the line with a flow rate of approximately  $55 \text{ L min}^{-1}$  determined by the sum of the flows  
159 drawn by the instruments ( $35 \text{ L min}^{-1}$ ), plus the flow measured at the exhaust of the sampling  
160 manifold ( $20 \text{ L min}^{-1}$ ). A flow of  $55 \text{ L min}^{-1}$  was estimated to meet nearly isokinetic sampling  
161 criteria at survey speed and the transmission of particles through the main inlet was  
162 approximately unity for diameters between 20 nm to  $1 \mu\text{m}$  (Leaitch et al., 2016). Although the  
163 transfer of the aerosol from outside to the instruments is relatively fast (5 seconds or less),  
164 volatilization of some components of the particles may have occurred. However, the growth of  
165 newly formed particles by organic condensation occurs primarily by low volatility organic  
166 components (e.g. Pierce et al., 2012). Thus, the integrity of the smaller particles is likely to have  
167 been maintained. We do expect increasing line losses of particles with sizes decreasing from 10  
168 nm. Therefore our observations will underestimate  $N_{5-20}$ .

169 Trace gases ( $\text{CO}$  and  $\text{H}_2\text{O}$ ) were sampled through a separate inlet made of a 0.4 cm (outer  
170 diameter) Teflon tube entering the aircraft at the main inlet and exiting through a rear-facing 0.95  
171 cm exhaust line that provided a lower line pressure. The sample flow of approximately  $12 \text{ L min}^{-1}$   
172 was continuously monitored.

## 173 2.2 Instrumentation

### 174 2.2.1 Meteorological parameters and state parameters

175 Aircraft state parameters and meteorological measurements were performed with an AIMMS-20  
176 manufactured by Aventech Research Inc. at a very high sampling frequency ( $>40\text{Hz}$ ). The  
177 AIMMS-20 consists of three modules: (1) The Air Data Probe that measures the three-  
178 dimensional aircraft-relative flow vector (true air speed, angle-of-attack, and sideslip), and  
179 turbulence with a three-dimensional accelerometer. As well, temperature and humidity sensors  
180 are contained within this unit and provide an accuracy and resolution of 0.30 and 0.01 C for  
181 temperature and 2.0 and 0.1% for relative humidity measurements. (2) An Inertial Measurement  
182 Unit that consists of three gyros and three accelerometers providing the aircraft angular rate and  
183 acceleration; (4) A Global Positioning System for aircraft 3D position and inertial velocity.  
184 Horizontal and vertical wind speeds were measured with accuracies of 0.50 and 0.75  $\text{m s}^{-1}$ ,  
185 respectively. The high frequency raw data were processed to 1Hz resolution. Further details of  
186 the AIMMS including data processing can be found in (Aliabadi et al., 2016a).

### 187 2.2.2 Aerosol physical and chemical properties

188 Particle number concentrations and particle size distributions were measured with a TSI 3787  
189 water-based ultrafine Condensation Particle Counter (UCPC), a Droplet Measurement  
190 Technology (DMT) Ultra High Sensitivity Aerosol Spectrometer (UHSAS) and a Brechtel  
191 Manufacturing Incorporated (BMI) Scanning Mobility System (SMS) coupled with a TSI 3010  
192 Condensation Particle Counter (CPC). The UCPC detected particle concentrations of particles  
193 larger than 5nm in diameter with a time resolution of 1 Hz. The flow rate was set to 0.6  $\text{L min}^{-1}$ .  
194 The particle concentrations measured by the UCPC are referred to as  $N_{\text{tot}}$  hereafter, noting as  
195 above that diffusional losses of particles smaller than 10 nm make the  $N_{\text{tot}}$  observations lower  
196 limits.

197 The BMI SMS was set to measure particle size distributions from 20nm to 100nm with a sample  
198 flow of 1  $\text{L min}^{-1}$  and a sheath flow of 6  $\text{L min}^{-1}$ . The duration of one scan was 40 s with a 20 s  
199 delay time before each scan resulting in a time resolution of 1min. The UHSAS performed size  
200 distribution measurements from 70 nm – 1  $\mu\text{m}$  at a time resolution of 1 Hz with a sample flow  
201 rate of 55  $\text{cm}^3 \text{min}^{-1}$ . Details of the calibrations and instrument inter-comparisons performed  
202 prior and during the campaign are described in detail in Leitch et al. (2016).

203 Cloud condensation nuclei (CCN) were measured with a DMT CCN Counter (CCNC). The  
204 CCNC was operated behind a constant pressure inlet that was set to 650 hPa. The nominal  
205 supersaturation was held constant at 1%. Calibrations prior and during the campaign (for details  
206 see Leitch et al. 2016) showed that a nominal supersaturation of 1% at the reduced pressure  
207 translated into 0.6% effective supersaturation.

208 Cloud droplet sizes from 2-45  $\mu\text{m}$  were measured using a wing mounted Particle Measuring  
209 System (PMS) FSSP 100. In this study these data are only used to identify periods when the  
210 aircraft was flying in cloud. To avoid possible artefacts produced from shattering of cloud  
211 droplets at the aerosol inlet, data from in-cloud times are discarded for the purposes of this study.

212 A DMT Single Particle Soot Photometer (SP2) was deployed to measure refractory black carbon  
213 (rBC) number and mass concentrations. We refer to rBC mass concentrations as an indication of  
214 pollution influence. Calibrations with Aquadag soot were performed prior to and during the  
215 campaign. The lower size limit of detection of rBC particles by the SP2 was approximately  
216 80nm.

217 Sub-micron aerosol composition was measured with an Aerodyne high-resolution time-of-flight  
218 aerosol mass spectrometer (HR-ToF-AMS; e.g. DeCarlo et al., 2006). A detailed description of  
219 the instrument is found in Willis et al. 2016. The main purpose of the instrument was to measure  
220 non-refractory particulate matter such as sulfate, nitrate, ammonium, methane sulfonic acid  
221 (MSA) and the sum of organics. Detection limits were 0.009, 0.008, 0.004, 0.005 and 0.08  $\mu\text{g m}^{-3}$ ,  
222 respectively, for a 30 second averaging time.

223

### 224 2.2.3 Trace gases

225 Carbon monoxide (CO) was measured with an Aerolaser ultra-fast carbon monoxide monitor  
226 model AL 5002 based on VUV fluorimetry, employing the excitation of CO at 150 nm. In-situ  
227 calibrations were performed during flight at regular intervals (15 – 30 min) using a NIST  
228 traceable CO standard with zero water vapor concentration. CO mixing ratios were used as a  
229 relative indicator of aerosol influenced by pollution sources.

230 Water vapour ( $\text{H}_2\text{O}$ ) measurements were based on infrared absorption using a LI-7200 enclosed  
231  $\text{CO}_2/\text{H}_2\text{O}$  Analyzer from LI-COR Biosciences GmbH. The measurement uncertainty is  $\pm 15$   
232  $\text{ppm}_v$ .  $\text{H}_2\text{O}$  mixing ratios were used to calculate relative humidity with pressure and temperature  
233 measured by the AIMMS-20.

### 234 2.3 Data analysis and nomenclature of particle size data

235 All particle data were averaged to 1 min intervals to match the time resolution of the BMI SMS.  
236 Particle concentrations within different size intervals were calculated. The notation  $N_{a-b}$  is used;  
237 “a” gives the lower limit and “b” the upper limit of the calculated size interval. The BMI SMS  
238 was used to determine concentrations of particles from 20-90 nm diameter, and concentrations of  
239 particles larger than 90 nm diameter were determined by the UHSAS. If the size interval is  
240 expressed as  $N_{>a}$  the upper limit is given by the detection limit of the UHSAS (1 $\mu\text{m}$ ).  
241 Additionally, particle concentrations from 5-20 nm (short:  $N_{5-20}$ ) were obtained by subtracting

242 particle concentrations measured by the BMI SMS and by the UHSAS from the  $N_{\text{tot}}$  as  
243 determined by the CPC. The  $N_{5-20}$  are also referred to as ultrafine particles (UFP) in this study.

244 In order to obtain vertical profiles the data were averaged within altitude intervals. An average  
245 profile for a single flight was obtained by binning all data from the respective flight into altitude  
246 intervals of 100m starting at the lowest flight altitude. In addition to data obtained during vertical  
247 profile flights, data acquired while flying at a constant level were also included. Average profiles  
248 containing data from more than one flight were calculated by averaging the respective single  
249 flight profiles.

250 Average size distributions were obtained by simply averaging each bin for the desired time and  
251 altitude range. The size distributions measured by the BMI SMS were used for particle sizes  
252 from 20-90 nm, and the distributions at larger sizes are taken from the UHSAS. All particle  
253 concentrations are expressed for ambient pressure conditions, i.e. they have not been adjusted to  
254 standard temperature and pressure conditions. The  $N_{5-20}$  referred to as UFP are added to the size  
255 distributions as additional bin assuming a bin width of 15 nm (from 5-20 nm) with the mid  
256 diameter of 12nm.

257

## 258 **2.4 FLEXPART-WRF Simulations**

259 We used FLEXPART-WRF (Brioude et al., 2013, website: [flexpart.eu/wiki/FpLimitedareaWrf](http://flexpart.eu/wiki/FpLimitedareaWrf))  
260 simulations run backwards in time to analyse the origins of air masses sampled along the flight  
261 tracks. FLEXPART-WRF is a Lagrangian particle dispersion model based on FLEXPART (Stohl  
262 et al., 2005). Meteorological information is obtained from the Weather Research and Forecasting  
263 (WRF) Model (Skamarock et al., 2005). FLEXPART-WRF outputs retroplume information such  
264 as the residence time of air (over a unit area) prior to sampling. Residence times were integrated  
265 over the entire atmospheric column and 7 days backward in time. FLEXPART-WRF was run in  
266 two ways. First, one FLEXPART-WRF was completed for each flight using particle releases  
267 every 2 minutes along the flight track (100 m x 100 m x 100 m centered on the aircraft location)  
268 to produce potential emissions sensitivities (PES) that represent the average air mass origin for  
269 each flight. Second, separate runs were completed for points (every 10 minutes) along the flight  
270 track (100 m x 100 m x 100 m, 60 second release duration) in order to study different air masses  
271 measured during the same flight. A more detailed description of the model as used for  
272 NETCARE 2014 is provided by Wentworth et al. (2015).

273



## 274 **2.5 Study area and flight tracks**

275 From July 4<sup>th</sup> to July 21<sup>st</sup>, 2014 eleven flights were conducted out of Resolute Bay (74.7 N, 95.0  
276 W). In Figure 1 a compilation of all flight tracks on a satellite image is shown. The satellite  
277 picture was taken on July 4<sup>th</sup>, 2014 and reflects the situation of the region during period I (July 4  
278 to July 12). Resolute Bay proved to be an ideal location for this study as we had access to both  
279 open ocean and ice covered regions. Additionally two polynyas were located north of Resolute  
280 Bay within the reach of our aircraft. Flights ranged between 4-6 hours. The flights covered two  
281 main areas: Lancaster Sound east of Resolute Bay and the area north of Resolute Bay where two  
282 polynyas were located. The flights south of Resolute Bay in Lancaster Sound concentrated  
283 around the ice edge.

284 The ice/water coverage visible on the satellite picture is representative for the area during the  
285 first period. As can be seen, the ice edge was situated about 150 km east of Resolute Bay. It is  
286 clearly visible in the satellite image as a sharp line. The transition from a completely ice covered  
287 region to open ocean was very abrupt during the first period. Only after a period of bad weather  
288 with high winds did the ice edge become less clear, and the region starting about 80 km east of  
289 Resolute Bay to about 200 km east was covered by fractured ice.

290 Roughly 50% of the flight time was within the inversion layer, and 50% was in the free  
291 troposphere conducting altitude profile flights. A considerable amount of time was spent at 2800  
292 m as this was the preferred altitude when travelling to a certain area. When clouds were present,  
293 the aircraft sampled them by slant profiling through the cloud in the case clouds were above the  
294 boundary layer, or, in the case clouds were within 200 m of the surface, by descending into the  
295 cloud as low as possible. Aerosol observations while inside cloud are excluded from the analysis  
296 here due to potential artifacts from droplets shattering on the outside inlet.

297

## 298 **3 Meteorological and atmospheric conditions**

299 Meteorological conditions changed over the course of the campaign. Similar conditions were  
300 encountered during the first part of the campaign (July 4<sup>th</sup> – July 12<sup>th</sup>, 6 flights), referred to as the  
301 “Arctic air mass period” because air masses from within the Arctic dominated and the  
302 atmosphere showed structures typical for the Arctic such as a low boundary layer height with  
303 thermally stable conditions, indicated by a near surface temperature inversion, and frequent  
304 formation of low level clouds. At this time Resolute Bay was under the influence of high  
305 pressure systems. Clear sky with few or scattered clouds and low wind speeds dominated.  
306 Conditions changed starting from July 13<sup>th</sup> when the region was influenced by troughs of a low  
307 pressure system located to the west above Beaufort Sea, which eventually passed through  
308 Resolute Bay on July 15<sup>th</sup> bringing along humidity, precipitation and fog. Intense fog and low  
309 visibility impeded flying from July 13<sup>th</sup> to July 16<sup>th</sup>. A short good weather window in which the  
310 fog dissipated permitted flying again on July 17<sup>th</sup> (referred to as “transition day”; one flight) just

311 before Resolute Bay came under influence of a pronounced low pressure system located to the  
312 south with its center around King William Island (69.0 N, 97.6 W). The last campaign days  
313 (referred to as “southern air mass period”, three flights) were characterised by the influence of  
314 this pronounced low pressure system bringing air masses from the south and providing higher  
315 wind speeds, an overcast sky and occasional precipitation.

316  
317 Vertical profiles of median temperature, relative humidity (RH), wind speed, CO and  $N_{\text{tot}}$  (Figure  
318 2) illustrate median atmospheric conditions during the measurement flights. Prominent features  
319 representing the trend of each period and reflecting the general meteorological situation will be  
320 described here, with details discussed in the respective sections. The Arctic air mass period was  
321 characterized by frequent thermally stable conditions within the near surface layer, representing  
322 typical conditions during the Arctic summertime (Aliabadi et al., 2016a; Tjernström et al., 2012).  
323 The median temperature profiles show that on average the boundary layer reached up to ~300 m  
324 with a temperature increase of about 5 C. In this paper we will refer to this part of the  
325 atmosphere as the boundary layer (BL) and to the air masses above as the free troposphere (FT).  
326 A BL height of 300m corresponds well to the boundary layer height of 275 +/- 164 m estimated  
327 by (Aliabadi et al., 2016a) using the method of bulk Richardson number (Aliabadi et al., 2016b)  
328 and a critical bulk Richardson number of 0.5, using data from radiosondes launched at Resolute  
329 Bay and the Amundsen icebreaker, which also performed research operations in Lancaster sound  
330 during the campaign period.

331 Within the BL particle concentrations spanned over a wide range of concentrations (max  $N_{\text{tot}}$ :  
332 ~10000; median values: ~150 to ~1700  $\text{cm}^{-3}$ ). Highest  $N_{\text{tot}}$  occurred during the Arctic air mass  
333 period, while  $N_{\text{tot}}$  was constantly low within the lower atmosphere on the transition day. Median  
334 temperatures near the surface ranged from -1 C to 5 C during the Arctic air mass period, largely  
335 depending on the terrain below (e.g. ice or open water) and were clearly higher during when the  
336 southern air masses arrived (e.g. at the “surface”: 4 C and 7 C, respectively) and, if present, the  
337 BL was less pronounced. The higher temperatures coincide with the influence of low pressure  
338 systems bringing warmer air masses from the west and south and additional higher wind speeds  
339 providing a better mixing of the atmospheric layers ( $5.6 \text{ ms}^{-1}$  vs  $12 \text{ m}^{-1}$  near the surface). CO  
340 mixing ratios were extremely low during the Arctic air mass period (median: 78.3  $\text{ppb}_v$ ) and on  
341 the transition day (median: 83.4  $\text{ppb}_v$ ) indicating pristine air masses that had not recently been  
342 affected by pollution or biomass burning sources. During the southern air mass influence CO  
343 mixing ratios clearly increased (median: 95.0  $\text{ppb}_v$ ) confirming a change in air mass and  
344 suggesting possible influences by pollution sources and wild fires in the North West Territories  
345 (Supplementary Figure 2). Relative humidity profiles show that the near surface layer of the  
346 atmosphere was very moist with  $\text{RH} > 80 \%$  during all periods.

347

## 348 4 Results and Discussion

### 349 4.1 Ultrafine particle events

#### 350 4.1.1 Frequency of ultrafine particle events

351 Throughout the campaign we observed large variability in particle concentrations (Figure 3). We  
352 observed not only very clean air masses with  $N_{\text{tot}}$  of a few tens  $\text{cm}^{-3}$  (with the lowest 1-second  
353 value of  $1 \text{ cm}^{-3}$ ), but also concentrations as high as a few thousands per  $\text{cm}^{-3}$  (with the highest  
354 value of  $10000 \text{ cm}^{-3}$ ). The highest and lowest concentrations were measured within the BL  
355 (Figure 3b). Above the BL (Figure 3b) particle concentrations were relatively constant where  
356 60% of the time concentrations were between  $200 - 300 \text{ cm}^{-3}$  (for a discussion of the average size  
357 distribution see sections 4.1.2 - 4.1.4). Especially during the Arctic air mass period (Figure 2) the  
358 atmosphere was characterized by a strong contrast between the BL and the FT.

359 UFP were very frequently present within the BL in high concentrations (Figure 3c). Here we  
360 refer to "bursts" of particles as a sudden and relatively large increase in  $N_{5-20}$ : concentrations  
361 suddenly rising from tens  $\text{cm}^{-3}$  to several hundreds and thousands  $\text{cm}^{-3}$ . This may reflect  
362 inhomogeneities in the NPF process or reflect the aircraft flying in and out of areas of high UFP  
363 concentrations. Bursts of  $N_{5-20} > 2000/\text{cm}^3$  were observed over polynyas, consistent with  
364 previous observations (Leitch et al., 1984; 1994), in Lancaster Sound and south of Resolute  
365 Bay. The  $N_{5-20}$  was higher than  $200 \text{ cm}^{-3}$  during 65% of the time. Indeed, high  $N_{\text{tot}}$  was mainly  
366 driven by UFP (as can be seen by comparison of black dots indicating high  $N_{\text{tot}}$  in Figure 3c and  
367 high UFP in Figure 3d). Whenever  $N_{\text{tot}}$  is greater than  $2000 \text{ cm}^{-3}$ , UFP was larger than  $1000 \text{ cm}^{-3}$ .  
368 This is also illustrated by the ratio of  $\text{UFP}/N_{\text{tot}}$  (Figure 3e). A ratio of zero means that no UFP  
369 were present, while a ratio of one means that only UFP were present. Within the boundary layer  
370 32% of the time the size distribution was dominated by UFP (ratio  $> 0.5$ ).

371 The frequent presence of UFP agrees well with other studies made during the Arctic summertime  
372 at several locations, such as at the ground stations in Ny Alesund and Zeppelin (Ström et al.,  
373 2009; Tunved et al., 2013), at Alert (Leitch et al., 2013), and from ship-based observations  
374 (Chang et al., 2011; Covert et al., 1996; Heintzenberg et al., 2006). However, such a frequent  
375 presence of an UFP mode (65% of the time  $> 200 \text{ cm}^{-3}$ ) in the BL is unique to this study.  
376 Possible reasons for the higher occurrence of UFP might be the combination of the proximity of  
377 open ocean (providing a source of UFP or precursor gases), favourable meteorological  
378 conditions (sunny weather, inversion layer with cloud formation) and very clean air masses with  
379 low condensation sinks. Also, since observations of UFP were one focus of this study, the  
380 fractional occurrence of the UFP mode may be biased slightly high due to longer sampling times  
381 associated with UFP occurrence. Calm weather conditions may have been another factor. The  
382 highest concentrations of UFP were measured at lower wind speeds ( $< 5 \text{ m s}^{-1}$ ; Supplementary  
383 Figure 1), while lower UFP concentrations ( $1000 \text{ cm}^{-3}$ ) were found at higher wind speeds

384 ( $>12\text{ms}^{-1}$ ) suggesting a dilution effect of the wind. Such a dilution effect implies proximity to the  
385 source.

386 In the following sections, the vertical distribution of UFP and the size distributions are discussed  
387 in relation to meteorological conditions during the three distinct periods that characterized this  
388 campaign.

389

#### 390 4.1.2 Arctic air mass period: July 4<sup>th</sup> to July 12<sup>th</sup>

391 During this first period the study area was under the influence of a high pressure system. As  
392 illustrated by FLEXPART-WRF results (Figure 4a and 4b), air masses were either coming from  
393 the North extending to the east in the Arctic Ocean or from the East passing over the open ocean  
394 in Lancaster Sound and Baffin Bay. Both examples indicate that air masses resided within the  
395 Arctic region at least 5 days prior to sampling. This is true for all flights during this period. The  
396 very low CO mixing ratios (78 ppb<sub>v</sub>, see Figure 2) and average BC mass concentrations of 3 ng  
397 m<sup>-3</sup> (not shown) confirm that air masses were very clean and without recent influence from  
398 pollution sources. As discussed in section 3, temperature profiles indicate thermally stable  
399 conditions in the lowest layers with near-surface temperature inversions. During almost all  
400 vertical profiles we observed temperature inversions of about 4-6 C near the surface. Such an  
401 atmospheric structure i.e. a shallow boundary layer is typical for the Arctic summertime (e.g.  
402 Aliabadi et al., 2016a; Tjernström et al., 2012).

403 The Arctic air mass period was characterized by a very sharp contrast between the BL and the  
404 FT in terms of particle number concentrations and sizes (Figure 5). The BL was characterized by  
405 a prominent layer of UFP from the surface to about 300 m with the highest concentrations closest  
406 to the surface (Figure 5a). The height of the UFP layer coincides with the average height of the  
407 temperature inversion for this period (see temperature profile Figure 2) and indicates that air  
408 masses were stably layered limiting exchange with the FT. This is supported by the observed  
409 lower turbulent mixing (i.e. turbulent kinetic energy) from boundary layer to the free troposphere  
410 during the campaign (Aliabadi et al., 2016a).

411 During this period we measured the highest concentrations of UFPs with the one minute average  
412 up to 5300 cm<sup>-3</sup>. On a typical flight several bursts (see Section 4.1.1) of high UFP concentrations  
413 were encountered in the BL. Particle bursts lasted from a few seconds to several minutes,  
414 corresponding to a spatial extent of several hundreds of meters to dozens of kilometers. The large  
415 spatial variability is also illustrated by the frequency distribution of UFP in the BL shown in  
416 Figure 5c: 40% of the time concentrations of UFP were larger than 200 cm<sup>-3</sup>, 11% of the time  
417 larger than 1000 cm<sup>-3</sup> and 3% of the time even larger than 2000 cm<sup>-3</sup>. Particle concentrations in  
418 the FT are relatively uniform, and concentrations of UFP were less than 50 cm<sup>-3</sup> up to 1200m and  
419  $\sim 10\text{ cm}^{-3}$  above.

420 The average  $N_{20-40}$  is similar to the UFP, showing a maximum in its concentration at the same  
421 altitude. The concentrations of larger particles ( $N_{>40}$ ,  $N_{>80}$ ,  $N_{>150}$ ) are much lower in the clean BL  
422 (surface areas of  $\sim 5\mu\text{m}^2 \text{m}^{-3}$  and lower). However, the  $N_{>40}$  and  $N_{>80}$  increase from the lowest  
423 altitude to the next averaged altitude, consistent with the increase in the UFP and  $N_{20-40}$ . These  
424 results suggest that some of the UFP experienced growth to sizes of 20-80 nm within a few  
425 hours, as demonstrated by Willis et al. (2016). Within the FT particle concentrations were  
426 surprisingly uniform and concentrations of UFP were less than  $50 \text{ cm}^{-3}$  up to 1200m and  $\sim 10 \text{ cm}^{-3}$   
427 above.

428 In Figure 5b, the median size distribution shows that increases in UPF in the BL were frequent.  
429 The average size distribution shows that at times higher concentrations of particles extended up  
430 to about 80 nm, consistent with the suggestion above that some UFP particles experienced  
431 growth to larger sizes. A relevant case will be discussed in Section 4.3. Occasionally a mode of  
432 particles larger than 400 nm was present in the BL over open water (see Section 4.2), which was  
433 likely the product of primary oceanic emissions.

434

#### 435 4.1.3 Transition day on July 17<sup>th</sup>

436 July 17<sup>th</sup> marks the transition from dominance by Arctic air masses to a more distant influence  
437 from southern air masses. The transition day consists of only one flight in the area of Lancaster  
438 Sound, during which low concentrations of particles larger than 20 nm were observed below 600  
439 m: e.g.  $N_{>40}$  ranged from  $60 \text{ cm}^{-3}$  to  $100 \text{ cm}^{-3}$ ; see Figure 6. The deeper layer of lower  
440 concentrations may have been a result of cloud processing and scavenging. During the days  
441 before flying was impossible because of intense fog and cloud at Resolute Bay. A different  
442 transport regime may also have contributed to this situation. On this day the low pressure system  
443 situated to the west was bringing air masses from the west along the Canadian and Alaskan  
444 coastline (Figure 4c). The temperature profile shows an inversion between 650-1000m possibly  
445 indicating a change in air mass. CO mixing ratios ( $83\text{ppb}_v$ ) and BC mass concentrations ( $3\text{ng}/\text{cm}^{-3}$ )  
446 were also quite low indicating mostly Arctic background conditions.

447 On this day, occasional bursts of UFP up to  $1400\text{-}1900 \text{ cm}^{-3}$  were observed within the boundary  
448 layer (Figure 6b). UFP of  $200 \text{ cm}^{-3}$  or more were observed about 20% of the time (Figure 6c),  
449 and the average concentration was  $240 \text{ cm}^{-3}$  at the lowest level of the profile (Fig. 6a).  
450 Concentrations of larger particles ( $N_{>40}$ ,  $N_{>80}$ ,  $N_{>150}$ ) increased sharply at about 700m coinciding  
451 with the temperature inversion. The very low concentrations of larger particles ( $N_{>150}$ :  $<10 \text{ cm}^{-3}$ )  
452 below the temperature inversion are very similar to the conditions encountered within the BL  
453 during the previous period. As above, the differences in the transition day below 700 m may  
454 have been due to a combination of fog/cloud scavenging and a change of air mass. Median and  
455 average size distributions indicate a minimum at around 65nm that might be the result of cloud

456 processing (Hoppel et al., 1994), consistent with the Arctic observations of (Heintzenberg et al.,  
457 2006) and the activation diameters observed during this study (Leaitch et al., 2016).

#### 458 4.1.4 Southern air mass period: July 19<sup>th</sup> – July 21<sup>st</sup>

459 During this period the region was under the influence of a low pressure system centered south of  
460 Resolute Bay. FLEXPART-WRF air mass trajectories (Figures 4d and 4e) indicate a prevalence  
461 of air masses from the south potentially affected by wild fires (see Supplementary Figure 2). At  
462 the beginning of this period on July 19<sup>th</sup> (Figure 4d), air mass trajectories suggest the strongest  
463 influence from the south while towards the end of the period on July 21<sup>st</sup> (Figure 4e),  
464 FLEXPART-WRF indicates that southern air masses mixed with air masses coming off  
465 Greenland. Near surface temperatures were higher than during the previous periods (Figure 2)  
466 and temperature inversions were less pronounced (2-4 C) and not observed at all locations  
467 suggesting a less stable lower atmosphere. On July 19<sup>th</sup> we encountered the highest wind speeds  
468 in the BL (16 m/s within the near surface layer and 20 m/s slightly above). Also RH was  
469 relatively high near the surface (91%) and did not drop below 80% throughout the vertical  
470 atmosphere. CO mixing ratios were higher than during the prior periods suggesting that the air  
471 was at times influenced by pollution or biomass burning.

472 UFP were observed less frequently than during the Arctic air mass period and in lower  
473 concentrations (Figure 7). Bursts of UFP above 1000 cm<sup>-3</sup> occurred only at three locations, all  
474 during the flight on July 21<sup>st</sup>. Average UFP concentrations were only approximately 190 cm<sup>-3</sup>.  
475 UFP concentrations of 200 cm<sup>-3</sup> or higher were detected 31% of the time below 300m (Figure  
476 7c).

477 The southern air mass period clearly shows different aerosol characteristics within the near  
478 surface layer than compared to the Arctic air mass period and the transition day. Average  
479 concentrations of particles larger than 40 nm were highest within the boundary layer and  
480 decreased with altitude (Figure 7a). This is in sharp contrast to the cleaner boundary layers  
481 observed before. Whereas concentrations of particles larger 40nm were ~100 cm<sup>-3</sup> and lower  
482 during both prior periods, they were as high as 300 cm<sup>-3</sup> for this period. Even large accumulation  
483 mode particles (N<sub>>150</sub>) averaged ~50 cm<sup>-3</sup> (compared to 10 cm<sup>-3</sup> for both previous periods). Also,  
484 both the median and average size distributions show a pronounced mode of particles larger than  
485 500 nm within the BL (Figure 7b). Primary emissions from the sea spray promoted by the higher  
486 surface wind speeds (see Figure 2) are likely a factor contributing to the larger particles.

487 During the southern air mass period, three important factors had changed compared to both prior  
488 periods. (1) Air mass back trajectories had clearly shifted to the south and potentially transported  
489 emissions from wild fires located in the Northwest Territories (Supplementary Figure 2) into the  
490 region, which might mix into the boundary layer. (2) The Amundsen ice breaker was present in  
491 Lancaster Sound and acted as a local pollution source. (3) Wind speeds were higher and the  
492 ocean was visibly turbulent with breaking waves that might enhance primary oceanic aerosol

493 emissions. The increased condensation sinks from these potential sources in combination with  
494 other factors (e.g. reduced sun light) and relatively low residence times of air masses within the  
495 boundary layer (compared to the Arctic air mass period) may explain the relatively low and  
496 infrequent concentrations of UFPs.

497 Within the FT the size distributions shows a bimodal character with a minima at 60-80 nm,  
498 which may indicate the air masses experienced cloud processing. This is likely, given the  
499 presence of the low pressure system bringing moister and warmer air masses. The bimodal size  
500 distribution is different from the average size distribution during the Arctic air mass period when  
501 drier air masses from within the Arctic dominated.

## 502 **4.2 UFP occurrence above ice versus water**

503 We investigated the potential influence of different underlying water surfaces on the occurrence  
504 of UFP by examining in detail the time periods when we were flying at altitudes at or below 500  
505 m during the Arctic air mass period. We distinguish between three water surfaces: ice covered  
506 areas (including ice edge and ice covered with melt ponds), open ocean (including polynyas),  
507 and low-level clouds (including both cloud above water and cloud above ice). Here we point out  
508 that the case “cloud” does not include in-cloud flight times but only flight periods when above  
509 cloud top without actually entering the cloud (confirmed by a zero signal in a liquid cloud probe  
510 (FSSP100)). An altitude of 500 m was chosen to include time periods when we were flying  
511 above low-level clouds and to capture mostly flights within the boundary layer where a local  
512 influence of the terrain below was likely. During the Arctic air mass period, there was a clear  
513 separation between ice and open water over Lancaster Sound with east of the ice edge  
514 completely ice free, while west of the ice edge the ocean was seamlessly covered by fast ice (see  
515 satellite picture in Figure 1).

516 Each average profile above the different water surface exhibits unique features (Figure 8). Above  
517 ice the highest concentrations of UFP (average:  $400 \text{ cm}^{-3}$ ) were found nearer the surface (70 m)  
518 and the  $N_{\text{tot}}$  are slightly higher (580). In the BL over open water, the  $N_{\text{tot}}$  and UFP number  
519 concentrations are  $900 \text{ cm}^{-3}$  and  $560 \text{ cm}^{-3}$ , respectively, and in the air just above cloud, the  
520 average  $N_{\text{tot}}$  and UFP number concentrations are  $2000 \text{ cm}^{-3}$  and  $1040 \text{ cm}^{-3}$ , respectively. In the  
521 open water and cloud cases, the highest concentrations of ultrafines are at the point of  
522 measurement closest to the water surface. In the cloud case and open water case, the  $N_{20-40}$   
523 particles show an increase at the same time as the  $N_{\text{tot}}$  and UFP suggesting that the UFP form and  
524 grow to larger sizes. This is not observed in the over-ice case, which suggests that some of the  
525 new particles could have formed elsewhere (e.g. over open water) and been transported over the  
526 ice, or that the growth rates over ice are slow. In all three cases, the largest particles show  
527 relatively smaller abundances at the lowest altitudes samples. An increased abundance of UFP at  
528 lower surface areas supports the hypothesis that UFP form via nucleation of precursor gases.

### 529 4.3 Case study: July 8

530 The flight on July 8 provides a case study illustrating that the occurrence of UFP is confined to  
531 the BL suggesting a surface source of UFP and that the appearance of UFP is promoted by cloud.  
532 We consider the altitude dependence of the UFP within the BL in relation to air mass history and  
533 cloud.

534 On this flight we first flew out into Lancaster Sound west of Resolute Bay, turned around and  
535 descended into the BL above the ice. Here, we focus on the time period from 15:50 UTC  
536 (descent into the BL) to 17:20 UTC where we travelled from west to east and remained within  
537 the BL but stayed out of cloud as shown in Figure 9; see also Supplementary Figure 2. The later  
538 part of the flight focused on in-situ cloud properties and is discussed elsewhere (Leitch et al.,  
539 2016). The weather was sunny with low level clouds starting around 150 km over ice and west of  
540 the ice edge in Lancaster Sound. The clouds had formed over the water and were blown over the  
541 ice where they were dissipating (Leitch et al., 2016). In the entire area the atmosphere was  
542 characterized by a surface temperature inversion extending vertically up to about 300 m with ~1  
543 C near the surface and ~5 C at 300 m and was accompanied by decreasing relative humidity  
544 (Figure 9f). Local low-level winds were predominantly from the south to east and wind speeds  
545 were below 5 ms<sup>-1</sup>.

546 UFP were present throughout the BL with the highest concentrations at the lowest altitudes and  
547 decreasing concentrations towards the top of the BL (Figure 9b). In contrast, larger particles (e.g.  
548 N<sub>>40</sub>) exhibit the opposite pattern, with lower concentrations at lower altitudes and higher  
549 concentrations at higher altitudes. Six locations from west to east (points A-F in Figure 9a) are  
550 used to illustrate the changing aerosol characteristics. Location A is situated well above the BL  
551 and at this point no UFP were present (detailed size distributions are shown in Supplementary  
552 Figure 4). At location B, the point at which we first entered the BL, an UFP mode (~370 cm<sup>-3</sup>)  
553 was present at 60m, while UFP concentrations were lower at slightly higher altitudes (~80 cm<sup>-3</sup>  
554 at 230 m) such as location C. At the lower altitudes the UFP concentrations gradually increased  
555 as we approached the ice edge. The most striking observation is the steep increase in particle  
556 concentrations at about 60 km west of the ice edge (location D) where UFP increased to above  
557 4000 cm<sup>-3</sup> at 150 m or just above cloud top. At the same time N<sub>20-40</sub> concentrations showed a  
558 similar increase. The increased UFP concentrations were vertically limited to near cloud top and  
559 decreased rapidly with increasing altitude. The same pattern is also observed for temperature,  
560 H<sub>2</sub>O and CO<sub>2</sub> (Figure 9g) suggesting the existence of a distinct air mass at the surface that gets  
561 diluted into the air mass above. Further east the flight was restricted to a slightly higher altitude  
562 above cloud top. At point F, where we were close to the BL top, no peaks in particle  
563 concentrations were observed. At point E, just before the ice edge, between the top of cloud and  
564 the top of the BL, UFP concentrations reached about 3400 cm<sup>-3</sup>.



565 Air mass histories at these locations determined from FLEXPART-WRF (Figure 10) indicate the  
566 following:

567 (1) To the west of Resolute Bay (point B) Lancaster Sound air masses had been mixed with air  
568 masses from the North. This is also confirmed by the local wind directions indicating winds  
569 coming from the Northwest sector (Figure 10a), and it is consistent with the associated change in  
570 cloud. (2) Near the top of the BL, air masses had descended recently ( $< 3$  h) into the BL (Figure  
571 10c point C and point F). (3) In contrast, deeper within the BL at points B and D air masses had  
572 descended into the BL earlier ( $\sim 20$  h) before arriving at the point of observation. In the case of  
573 point D, where we observed the largest mode of UFP extending above 40nm, air masses had  
574 been travelling from the east exclusively over the open waters in Lancaster Sound during the last  
575 day before arriving at the point of observation.

576 Aerosol composition shows a clear difference between the aerosol in the FT and the BL. The  
577 aerosol sulphate rapidly decreases as we enter the BL around 16:00, while aerosol organic **mass**  
578 **concentrations** show an initial relative increase followed by an absolute increase towards the east  
579 (Figure 9c). Within the BL aerosol organics and sulphate mass loadings show a pattern similar to  
580  $N_{>40}$  and  $N_{>80}$ . Both decrease each time we descended deeper into the BL. However, at the same  
581 time the organics-to-sulphate ratio indicates that the relative contribution of organics to aerosol  
582 mass increases at lower altitudes and especially above cloud (Figure 9e). Well within the  
583 inversion layer and in the vicinity of cloud top the aerosol was dominated by organics. At the  
584 same time also ratio of MSA to sulphate was higher (Figure 9e), suggesting a marine biogenic  
585 influence of the aerosol sulphur. The marine biogenic influence at the lower altitudes agrees well  
586 with the FLEXPART-WRF simulations showing that air masses at this altitude had spent almost  
587 an entire day exposed to the open waters in Lancaster Sound. Consistent with the higher organic  
588 content measured with the AMS, the single particle aerosol mass spectrometer ALABAMA  
589 (Brands et al., 2011; Willis et al., 2016) detected a higher fraction of trimethylamine (TMA)-  
590 containing particles for particles larger than 150 nm in diameter (F. Köllner, personal  
591 communication, July 2016). Gaseous TMA emissions from marine biogenic origin (Ge et al.,  
592 2011; Gibb et al., 1999) may have additionally favored the subsequent growth of the freshly  
593 nucleated particles by condensation. Another possibility may be uptake of TMA in the cloud  
594 phase (Rehbein et al., 2011) if the particles have grown to sufficiently large sizes to be activated  
595 as CCN. Interestingly, compared to other days these TMA-containing particles are smaller and to  
596 a lesser degree internally mixed with potassium and levoglucosan which supports the hypothesis  
597 of ultrafine particles originating from nucleation in a biogenic marine environment and  
598 subsequent growth.

599 To explain these observations, we hypothesize that the smaller particle mode is formed by  
600 nucleation and growth occurring within the BL and especially in cloud vicinity. UFP  
601 concentrations near cloud top have been reported before (e.g. Radke and Hobbs 1991,  
602 Wiedensohler et al. 1997, Clarke et al., 1999; Garrett et al., 2002; Hegg et al., 1990; Mauldin et

603 al., 1997) and it is suggested that nucleation in near cloud regions is favoured by the low surface  
604 areas, possibly due to cloud scavenged aerosol, moist air and a high actinic flux. Indeed, near  
605 cloud top where we observed an increase of UFP extending up to almost 50 nm the conditions  
606 for nucleation and growth are ideal. We speculate that the availability of precursor gases is  
607 provided by the long residence time (~20h) of the air masses over open water (Figure 10, point  
608 D). **In other words, precipitating clouds scavenge aerosol particles, reducing the surface area for  
609 condensation, but some fraction of nucleation precursor gases with lower Henry's Law constants  
610 can pass through (e.g. SO<sub>2</sub>) leaving the potential for H<sub>2</sub>SO<sub>4</sub> in the higher OH in the cloud  
611 outflow (a discussion of the processes can be found in Seinfeld and Pandis, 1998).** The very high  
612 organic loadings and MSA to sulphate ratio likely indicate that the formation and growth of these  
613 particles is driven by a combination of DMS and organic precursors (volatile organic  
614 compounds) that are emitted by the open ocean in Lancaster Sound (e.g. Chang et al., 2011;  
615 Sjostedt et al., 2012; Mungall et al., 2016).

616 The event at point E occurs where the aircraft was between cloud top and the top of the BL,  
617 where no increases in UFP were observed before or after. It may be that the aircraft descended  
618 slightly but sufficiently into the cloud-influenced area, which looks to be 25-40 m above cloud  
619 top (Figure 9g), but also at that point we were in vicinity of Prince Leopold Island which is a bird  
620 sanctuary and many bird colonies nest at the 260m high cliff. FLEXPART-WRF and the in-situ  
621 wind measurement show that air masses to a large extent were directly coming off the island  
622 (Figure 10, point E) suggesting a connection between the appearance of UFP and possible  
623 emissions from the fauna of the island. The increase of particle phase ammonium (Figure 9d) at  
624 the same time supports this connection and nucleation of particles from biogenic precursors  
625 emitted by bird colonies are documented (Weber et al., 1998; Wentworth et al., 2016, Croft et al.  
626 2016b).

627 Alternatively, it should be considered that evaporating fog and cloud droplets may also act as a  
628 primary source of UFP (e.g. Heintzenberg et al., 2006; Karl et al., 2013; Leck and Bigg, 1999).  
629 Karl et al., (2013) suggested a combined pathway that involves the emission of UFP by fog and  
630 cloud droplets, together with secondary processes enabling growth of these particles. For our  
631 observations we have no reason to assume that nucleation does not occur since conditions are  
632 ideal but we cannot rule out that nanoparticles are emitted by the possibly evaporating cloud  
633 droplets onto which gases then condense.

634 In conclusion the aerosol mass within the near surface layer is dominated by organics relative to  
635 sulphate, while at just slightly higher altitude sulphate is clearly increased and increases further  
636 above the inversion layer. A high organic content coincides with increases in UFP particles,  
637 especially at times when also growth into the size range up to 50nm is indicated. Similarly the  
638 MSA-to-sulphate ratio shows a peak at the lowest altitudes with maximum values in the vicinity  
639 of clouds that coincide with a long residence time (~20h) of the air masses within the BL and  
640 above open water. The data thereby suggest a marine biogenic influence of the aerosol within the

641 lower layers of the atmosphere. We note that similarly high levels of aerosol organics and MSA  
642 were observed during the flight on July 12 associated with a NPF event and growth but in cloud-  
643 free conditions Willis et al. (2016).

#### 644 **4.4 CCN activity**

645 CCN concentrations were measured at a supersaturation of 0.6%. The vertical profiles of CCN  
646 concentrations (Figure 11a) show patterns similar to those of larger particles. In the very clean  
647 boundary layer of the Arctic air mass period and the transition day CCN concentrations are  
648 equally low ( $\sim 70 \text{ cm}^{-3}$  and  $\sim 50 \text{ cm}^{-3}$ , respectively). In contrast, southern air mass period average  
649 BL CCN concentrations are amongst the highest observed during this campaign ( $>300 \text{ cm}^{-3}$ ).  
650 Within the free troposphere CCN concentrations are surprisingly constant during the Arctic air  
651 mass period ( $120 \pm 27 \text{ cm}^{-3}$ ) and more variable on the transition day ( $92 \pm 46 \text{ cm}^{-3}$ ) and the  
652 southern air mass period ( $103 \pm 67 \text{ cm}^{-3}$ ). The constant CCN concentrations during the Arctic air  
653 mass period correspond to the very uniform atmosphere dominated by aged aerosols we  
654 observed during this period and to the more layered atmosphere influenced by southern air  
655 masses possibly contaminated by biomass burning plumes during the later period. Correlations  
656 with  $N_{>80}$  (Figure 11b) confirm that larger particles are a good approximation for these CCN  
657 concentrations. On average CCN concentrations agree to within  $\pm 20 \%$  of  $N_{>80}$ . However, it  
658 should be noted that slight differences between the 3 periods are indicated in the correlation  
659 curves: during the Arctic air mass period the average activation diameters are smaller than 80  
660 nm, and during the southern air mass period they are larger than 80 nm. Assuming uniform  
661 chemical composition throughout the particle size range, an activation diameter of 80 nm at 0.6%  
662 supersaturation indicates an aerosol much less hygroscopic than, for example, ammonium  
663 sulphate; pure ammonium sulphate particles would activate at 40 nm at 0.6% supersaturation. For  
664 the one specific event during which growth occurred (Willis et al., 2016), it was demonstrated  
665 that high CCN concentrations coincide with elevated organic mass loading. The reduced  
666 hygroscopicity of organic material relative to soluble inorganic salts (Petters and Kreidenweis,  
667 2007) can explain the larger effective activation diameter.

668 A central question is whether and to what degree the CCN are influenced by the UFP. Two  
669 factors help with addressing this question: 1) particles as small as 20 nm and in general much  
670 smaller than the average 80 nm size associated with the CCN at 0.6% will nucleate cloud  
671 droplets in the clean environment of the summer Arctic (Leaith et al., 2016); 2) there is  
672 evidence here that increases in particles larger than 20 nm are associated with increases in the  
673 UFP, particularly for UFP influenced by cloud (e.g. Figure 8). Figure 12 shows regressions of  
674 CCN with UFP,  $N_{>20}$ ,  $N_{>30}$ ,  $N_{>40}$  and  $N_{>50}$ . The high variability in the UFP and the time needed  
675 for a UFP particle to grow to an average size of 80 nm under these low precursor levels does not  
676 permit a direct connection of the CCN and UFP, but in all other cases, the main clusters of the  
677 regressions show quite similar and strong connections with the CCN measurements.

678 Associations of the UFP with the  $N_{>20}$  in the BL mean that some of these UFP are able to  
679 contribute to cloud-nucleating particles.

680

## 681 **5 Discussion and Conclusions**

682 This study presents airborne observations of ultrafine particles (UFP) during the Arctic  
683 summertime. Eleven flights were conducted in July 2014 in the area of Resolute Bay situated in  
684 the Canadian Archipelago. The location allowed access to open water, ice-covered regions and  
685 low clouds. Flights focused around the ice edge in Lancaster Sound including open waters to the  
686 east, the ice-covered region to the west, and polynas north of Resolute Bay. UFP were observed  
687 within all regions and above all terrains with the highest concentrations encountered in the  
688 boundary layer immediately above cloud and open water. It is shown that UFP occur most  
689 frequently (>65 % of the time) and with the highest concentrations (up to  $5300 \text{ cm}^{-3}$ ) during an  
690 Arctic air mass period when the air is very clean and the boundary layer is thermally stable.

691 The frequent presence of UFP in the boundary layer over open water and low cloud and the  
692 enhanced number concentrations at the lowest altitudes sampled indicate a surface source, such  
693 as the ocean, for the UFP gaseous precursors. This is especially true during the Arctic air mass  
694 period when the sampling region was pristine and not influenced by pollution. FLEXPART-  
695 WRF simulations indicate that air masses had resided within the Arctic region at least 5-7 days  
696 prior to sampling. During this time UFP were restricted to the boundary layer and no UFP events  
697 were observed aloft, thereby excluding that these UFP form in the free troposphere and subside  
698 into the near surface layer e.g. (Clarke et al., 1998; Quinn and Bates, 2011). At the same time we  
699 observed an extremely clean boundary layer (surface area of  $N_{>40} \sim 5 \mu\text{m}^2\text{m}^{-3}$ ). Low surface areas  
700 increase the probability of particle formation via nucleation by reducing the surfaces for  
701 precursor gases to condense on.

702 Chlorophyll-a concentrations (Supplementary Figure 5) indicate a relatively high level of  
703 biological activity of the ocean (such as phytoplankton blooms known to produce DMS)  
704 throughout Lancaster Sound, to the east in Baffin Bay and in the open waters of the polynyas  
705 during the time period of the study. Indeed, measurements in Lancaster Sound performed from  
706 the Amundsen ice breaker just a few days after the aircraft campaign show that gas-phase DMS  
707 mixing ratios were high in the Lancaster Sound region (Mungall et al., 2016), up to 1155 ppt<sub>v</sub>.  
708 DMS was also measured from the Polar 6 aircraft with an offline technique. Maximum mixing  
709 ratios of 110 ppt<sub>v</sub> were detected in the surface layer (R. Ghahremaninezhad; personal  
710 communication), again confirming a marine influence in the boundary layer. The measured DMS  
711 concentrations are above the nucleation threshold obtained by modelling performed in the study  
712 of Chang et al. (2011) who concluded that DMS mixing ratios of  $\geq 100\text{ppt}_v$  are sufficient to  
713 account for the formation of hundreds of UFP when background particle concentrations are low.

714 Relating observations of UFP to the surface below during the Arctic air mass period revealed  
715 that the highest UFP concentrations occurred above low-level cloud and open water with  
716 averages of  $1040 \text{ cm}^{-3}$  and  $560 \text{ cm}^{-3}$ , respectively. Above low-level cloud  $N_{20-40}$  showed  
717 increased concentrations. This simultaneous increase in concentrations suggests that UFP grow  
718 into the 40 nm size range, where they can nucleate cloud droplets.

719 Overall, the summertime Arctic is an active region in terms of new particle formation,  
720 occasionally accompanied by growth. The value of these altitude profiles across a wide spatial  
721 extent, performed for the first time in this campaign, is that they demonstrate that this activity is  
722 largely confined to the boundary layer, and that the dominant source of small particles to the  
723 boundary layer does not arise by mixing from aloft but most likely from marine sources. For  
724 future studies, the relative impact of such natural sources of UFP needs to be evaluated with  
725 respect to potential new sources, such as may arise with increasing shipping.

726

## 727 **Acknowledgements**

728 The authors would like to thank a large number of people for their contributions to this work. We  
729 thank Kenn Borek Air, in particular the pilots Kevin Elke and John Bayes and the aircraft  
730 engineer Kevin Riehl. We are grateful to John Ford, David Heath and the University of Toronto  
731 machine shop for safely mounting our instruments on racks for aircraft deployment. We thank  
732 Jim Hodgson and Lake Central Air Services in Muskoka, Jim Watson (Scale Modelbuilders,  
733 Inc.), Julia Binder and Martin Gerhmann (Alfred Wegener Institute, Helmholtz Center for Polar  
734 Marine Research, AWI), Mike Harwood and Andrew Elford (Environment and Climate Change  
735 Canada, ECCC), for their support of the integration of the instrumentation and aircraft. We  
736 gratefully acknowledge Carrie Taylor (ECCC), Bob Christensen (U of T), Lukas Kandora,  
737 Manuel Sellmann and Jens Herrmann (AWI), Desiree Toom, Sangeeta Sharma, Dan Veber,  
738 Andrew Platt, Anne Marie Macdonald, Ralf Staebler and Maurice Watt (ECCC) for their support  
739 of the study. We thank the Biogeochemistry department of MPIC for providing the CO  
740 instrument and Dieter Scharffe for his support during the preparation phase of the campaign. The  
741 authors J.L. Thomas and K.S. Law acknowledge funding support from the European Union  
742 under Grant Agreement n\_ 5265863 – ACCESS (Arctic Climate Change, Economy and Society)  
743 project (2012-2015) and TOTAL SA. Computer simulations were performed on the IPSL  
744 mesoscale computer center (Mésocentre IPSL), which includes support for calculations and data  
745 storage facilities. We thank the Nunavut Research Institute and the Nunavut Impact Review  
746 Board for licensing the study. Logistical support in Resolute Bay was provided by the Polar  
747 Continental Shelf Project (PCSP) of Natural Resources Canada under PCSP Field Project  
748 #218614, and we are particularly grateful to Tim McCagherty and Jodi MacGregor of the PCSP.  
749 Funding for this work was provided by the Natural Sciences and Engineering Research Council  
750 of Canada through the NETCARE project of the Climate Change and Atmospheric Research

751 Program, the Alfred Wegener Institute, Helmholtz Center for Polar and Marine Research and  
752 Environment and Climate Change Canada.  
753

753 **References**

- 754 Aliabadi, A. A., Staebler, R. M., Liu, M. and Herber, A.: Characterization and Parametrization of  
755 Reynolds Stress and Turbulent Heat Flux in the Stably-Stratified Lower Arctic Troposphere  
756 Using Aircraft Measurements, *Boundary-Layer Meteorol.*, doi:10.1007/s10546-016-0164-7,  
757 2016a.
- 758 Aliabadi, A. A., Staebler, R. M., de Grandpré, J., Zadra, A. and Vaillancourt, P. A.: Comparison  
759 of Estimated Atmospheric Boundary Layer Mixing Height in the Arctic and Southern Great  
760 Plains under Statically Stable Conditions: Experimental and Numerical Aspects, *Atmosphere-*  
761 *Ocean*, 54(1), 60–74, doi:10.1080/07055900.2015.1119100, 2016b.
- 762 Asmi, E., Kondratyev, V., Brus, D., Laurila, T., Lihavainen, H., Backman, J., Vakkari, V.,  
763 Aurela, M., Hatakka, J., Viisanen, Y., Uttal, T., Ivakhov, V. and Makshtas, A.: Aerosol size  
764 distribution seasonal characteristics measured in Tiksi, Russian Arctic, *Atmos. Chem. Phys.*,  
765 16(3), 1271–1287, doi:10.5194/acp-16-1271-2016, 2016.
- 766 **Barrie, L. A.: Arctic air pollution: An overview of current knowledge, *Atmos. Environ.*, 20(4),**  
767 **643–663, doi:10.1016/0004-6981(86)90180-0, 1986.**
- 768 Bigg, E. K. and Leck, C.: Properties of the aerosol over the central Arctic Ocean, *J. Geophys.*  
769 *Res.*, 106(D23), 32101, doi:10.1029/1999JD901136, 2001.
- 770 Boé, J., Hall, A. and Qu, X.: September sea-ice cover in the Arctic Ocean projected to vanish by  
771 2100, *Nat. Geosci.*, 2(5), 341–343, doi:10.1038/ngeo467, 2009.
- 772 Brands, M., Kamphus, M., Böttger, T., Schneider, J., Drewnick, F., Roth, a., Curtius, J., Voigt,  
773 C., Borbon, a., Beekmann, M., Bourdon, a., Perrin, T. and Borrmann, S.: Characterization of a  
774 Newly Developed Aircraft-Based Laser Ablation Aerosol Mass Spectrometer (ALABAMA) and  
775 First Field Deployment in Urban Pollution Plumes over Paris During MEGAPOLI 2009, *Aerosol*  
776 *Sci. Technol.*, 45(1), 46–64, doi:10.1080/02786826.2010.517813, 2011.
- 777 Brioude, J., Arnold, D., Stohl, A., Cassiani, M., Morton, D., Seibert, P., Angevine, W., Evan, S.,  
778 Dingwell, A., Fast, J. D., Easter, R. C., Pisso, I., Burkhardt, J. and Wotawa, G.: The Lagrangian  
779 particle dispersion model FLEXPART-WRF version 3.1, *Geosci. Model Dev.*, 6(6), 1889–1904,  
780 doi:10.5194/gmd-6-1889-2013, 2013.
- 781 Browse, J., Carslaw, K. S., Arnold, S. R., Pringle, K. and Boucher, O.: The scavenging processes  
782 controlling the seasonal cycle in Arctic sulphate and black carbon aerosol, *Atmos. Chem. Phys.*,  
783 12(15), 6775–6798, doi:10.5194/acp-12-6775-2012, 2012.
- 784 Browse, J., Carslaw, K. S., Mann, G. W., Birch, C. E., Arnold, S. R. and Leck, C.: The complex  
785 response of Arctic aerosol to sea-ice retreat, *Atmos. Chem. Phys.*, 14(14), 7543–7557,  
786 doi:10.5194/acp-14-7543-2014, 2014.
- 787 Carslaw, K. S., Lee, L. A., Reddington, C. L., Pringle, K. J., Rap, A., Forster, P. M., Mann, G.  
788 W., Spracklen, D. V., Woodhouse, M. T., Regayre, L. A. and Pierce, J. R.: Large contribution of  
789 natural aerosols to uncertainty in indirect forcing., *Nature*, 503(7474), 67–71,  
790 doi:10.1038/nature12674, 2013.

791 Chang, R. Y. W., Sjostedt, S. J., Pierce, J. R., Papakyriakou, T. N., Scarratt, M. G., Michaud, S.,  
792 Levasseur, M., Leaitch, W. R. and Abbatt, J. P. D.: Relating atmospheric and oceanic DMS  
793 levels to particle nucleation events in the Canadian Arctic, *J. Geophys. Res. Atmos.*, 116(21), 1–  
794 10, doi:10.1029/2011JD015926, 2011.

795 Charlson, R. J., Lovelock, J. E., Andreae, M. O. and Warren, S. G.: Oceanic phytoplankton,  
796 atmospheric sulphur, cloud albedo and climate, *Nature*, 326, 655–661, doi:10.1038/326655a0,  
797 1987.

798 Clarke, A. D., L, V. J., Eisele, F., Mauldin, R. L., Tanner, D. and M, L.: Particle production in  
799 the remote marine atmosphere: Cloud outflow and subsidence during ACE 1, *Earth Sci.*, 103,  
800 1998.

801 Clarke, A. D., Kapustin, V. N., Eisele, F. L., Weber, R. J. , and McMurry, P. H.: Particle  
802 production near marine clouds: sulfuric acid and predictions from classical binary nucleation,  
803 *Geophys. Res. Lett.*, 26, 2425-2428, doi: 10.1029/1999GL900438, 1999.

804 Covert, D. S., Wiedensohler, A., Aalto, P., Heintzenberg, J., McMurry, P. H. and Leck, C.:  
805 Aerosol number size distributions from 3 to 500 nm diameter in the arctic marine boundary layer  
806 during summer and autumn, *Tellus, Ser. B Chem. Phys. Meteorol.*, 48(2), 197–212, 1996.

807 Croft, B., Martin, R. V., Leaitch, W. R., Tunved, P., Breider, T. J., D’Andrea, S. D. and Pierce, J.  
808 R.: Processes controlling the seasonal cycle of Arctic aerosol number and size distributions,  
809 *Atmos. Chem. Phys.*, 16, 3665-3682, doi:10.5194/acp-16-3665-2016, 2016a.

810 Croft, B., G.R. Wentworth, R.V. Martin, W.R. Leaitch, J.G. Murphy, B.N. Murphy, J. Kodros,  
811 J.P.D. Abbatt and J.R. Pierce. Contribution of Arctic seabird-colony ammonia to atmospheric  
812 particles and cloud-albedo radiative effect. *Nat. Commun.* 7, 13444, doi: 10.1038/ncomms13444,  
813 2016b.

814 DeCarlo, P. F., Kimmel, J. R., Trimborn, A., Northway, M. J., Jayne, J. T., Aiken, A. C., Gonin,  
815 M., Fuhrer, K., Horvath, T., Docherty, K. S., Worsnop, D. R. and Jimenez, J. L.: Field-  
816 deployable, high-resolution, time-of-flight aerosol mass spectrometer., *Anal. Chem.*, 78(24),  
817 8281–9, doi:10.1021/ac061249n, 2006.

818 Engvall, A.-C., Krejci, R., Ström, J., Minikin, A., Treffeisen, R., Stohl, A. and Herber, A.: In-situ  
819 airborne observations of the microphysical properties of the Arctic tropospheric aerosol during  
820 late spring and summer, *Tellus B*, 0(0), 080414161623888–???, doi:10.1111/j.1600-  
821 0889.2008.00348.x, 2008.

822 Engvall, a.-C., Krejci, R., Ström, J., Treffeisen, R., Scheele, R., Hermansen, O. and Paatero, J.:  
823 Changes in aerosol properties during spring-summer period in the Arctic troposphere, *Atmos.*  
824 *Chem. Phys.*, 8, 445-462, doi:10.5194/acp-8-445-2008, 2008.

825 Garrett, T. J.: Effects of varying aerosol regimes on low-level Arctic stratus, *Geophys. Res. Lett.*,  
826 31(17), L17105, doi:10.1029/2004GL019928, 2004.

827 Garrett, T. J., Hobbs, P. V and Radke, L. F.: High Aitken Nucleus Concentrations above Cloud  
828 Tops in the Arctic, *J. Atmos. Sci.*, 59(3), 779–783, doi:10.1175/1520-  
829 0469(2001)059<0779:HANCAC>2.0.CO;2, 2002.



830 Garrett, T. J., Brattström, S., Sharma, S., Worthy, D. E. J. and Novelli, P.: The role of  
831 scavenging in the seasonal transport of black carbon and sulfate to the Arctic, *Geophys. Res.*  
832 *Lett.*, 38(16), 1–6, doi:10.1029/2011GL048221, 2011.

833 Ge, X., Wexler, A. S. and Clegg, S. L.: Atmospheric amines - Part I. A review, *Atmos. Environ.*,  
834 45(3), 524–546, doi:10.1016/j.atmosenv.2010.10.012, 2011.

835 Gibb, S. W., Mantoura, R. F. C. and Liss, P. S.: Ocean-atmosphere exchange and atmospheric  
836 speciation of ammonia and methylamines in the region of the NW Arabian Sea, *Global*  
837 *Biogeochem. Cycles*, 13(1), 161–178, doi:10.1029/98GB00743, 1999.

838 Hegg, D. A., Radke, L. F. and Hobbs, P. V: Particle production associated with marine clouds, *J.*  
839 *Geophys. Res. Atmos.*, 95(D9), 13917–13926, 1990.

840 Heintzenberg, B. J.: Particle size distribution and optical properties, *Tellus*, 32, 251–260,  
841 10.1111/j.2153-3490.1980.tb00952.x, 1980.

842 Heintzenberg, B., Ström, J., Ogren, J. A., and Fimpel, H.-P.: Vertical profiles of aerosol  
843 properties in the summer troposphere of central Europe, scandinavia and the svalbard region,  
844 *Atmos. Env.*, 25, 621-627, doi: 10.1016/0960-1686(91)90059-G, 1991.

845 Heintzenberg, B., and Leck, C.: Seasonal variation of the atmospheric aerosol near the top of the  
846 marine boundary layer over Spitsbergen related to the Arctic sulphur cycle. *Tellus B*, 46, 52-67,  
847 doi: 10.1034/j.1600-0889.1994.00005.x, 1994.

848 Heintzenberg, J., Leck, C., Birmili, W., Wehner, B., Tjernström, M., Wiedensohler, A.,  
849 Tjernstrom, M. and Wiedensohler, A.: Aerosol number-size distributions during clear and fog  
850 periods in the summer high Arctic: 1991, 1996 and 2001, *Tellus B*, 58(1), 41–50,  
851 doi:10.1111/j.1600-0889.2005.00171.x, 2006.

852 Heintzenberg, J. and Leck, C.: The summer aerosol in the central Arctic 1991–2008: did it  
853 change or not?, *Atmos. Chem. Phys.*, 12(9), 3969–3983, doi:10.5194/acp-12-3969-2012, 2012.

854 Heintzenberg, J., Leck, C. and Tunved, P.: Potential source regions and processes of aerosol in  
855 the summer Arctic, *Atmos. Chem. Phys.*, 15(11), 6487–6502, doi:10.5194/acp-15-6487-2015,  
856 2015.

857 Hoppel, W. a., Frick, G. M., Fitzgerald, J. W. and Larson, R. E.: Marine boundary layer  
858 measurements of new particle formation and the effects nonprecipitating clouds have on aerosol  
859 size distribution, *J. Geophys. Res.*, 99(D7), 14443, doi:10.1029/94JD00797, 1994.

860 Karl, M., Leck, C., Gross, A. and Pirjola, L.: A study of new particle formation in the marine  
861 boundary layer over the central Arctic Ocean using a flexible multicomponent aerosol dynamic  
862 model, *Tellus B*, 64(0), 1–24, doi:10.3402/tellusb.v64i0.17158, 2012.

863 Karl, M., Leck, C., Coz, E. and Heintzenberg, J.: Marine nanogels as a source of atmospheric  
864 nanoparticles in the high Arctic, *Geophys. Res. Lett.*, 40(14), 3738–3743, doi:10.1002/grl.50661,  
865 2013.

866 Kulmala, M., Dal Maso, M., Mäkelä, J. M., Pirjola, L., Väkevä, M., Aalto, P., Miikkulainen, P.,  
867 Hämeri, K. and O’Dowd, C. D.: On the formation, growth and composition of nucleation mode  
868 particles, *Tellus, Ser. B Chem. Phys. Meteorol.*, 53, 479–490, doi:10.1034/j.1600-

869 0889.2001.d01-33.x, 2001.

870 Kupiszewski, P., Leck, C., Tjernström, M., Sjogren, S., Sedlar, J., Graus, M., Müller, M.,  
871 Brooks, B., Swietlicki, E., Norris, S. and Hansel, A.: Vertical profiling of aerosol particles and  
872 trace gases over the central Arctic Ocean during summer, *Atmos. Chem. Phys.*, 13(24), 12405–  
873 12431, doi:10.5194/acp-13-12405-2013, 2013.

874 Law, K. S., Stohl, A., Quinn, P. K., Brock, C. A., Burkhart, J. F., Paris, J. D., Ancellet, G.,  
875 Singh, H. B., Roiger, A., Schlager, H., Dibb, J., Jacob, D. J., Arnold, S. R., Pelon, J. and  
876 Thomas, J. L.: Arctic air pollution: New insights from POLARCAT-IPY, *Bull. Am. Meteorol.*  
877 *Soc.*, 95(12), 1873–1895, doi:10.1175/BAMS-D-13-00017.1, 2014.

878 Leaitch, W.R., Hoff, R.M., Melnichuk, S., and Hogan, W.: Some chemical and physical  
879 properties of the Arctic winter aerosol in northeastern Canada. *J. Climate Appl. Meteorol.*, 23,  
880 916-928, [http://dx.doi.org/10.1175/1520-0450\(1984\)023<0916:SPACPO>2.0.CO;2](http://dx.doi.org/10.1175/1520-0450(1984)023<0916:SPACPO>2.0.CO;2), 1984.

881 Leaitch, W.R., Barrie, L.A., Bottenheim, J.W., Li, S.-M., Shepson, P. and Yokouchi, Y.:  
882 Airborne observations related ozone depletion at polar sunrise. *J. Geophys. Res.*, 99, 25499-  
883 25517, 10.1029/94JD02750, 1994.

884 Leaitch, W. R., Sharma, S., Huang, L., Toom-Saunty, D., Chivulescu, A., Macdonald, A. M.,  
885 von Salzen, K., Pierce, J. R., Bertram, A. K., Schroder, J. C., Shantz, N. C., Chang, R. Y. W. and  
886 Norman, A.-L.: Dimethyl sulfide control of the clean summertime Arctic aerosol and cloud,  
887 *Elem. Sci. Anth.*, 1(1), 17, doi:10.12952/journal.elementa.000017, 2013.

888 Leaitch, W. R., Korolev, A., Aliabadi, A. A., Burkart, J., Willis, M., Abbatt, J. P. D., Bozem, H.,  
889 Hoor, P., Köllner, F., Schneider, J., Herber, A., Konrad, C. and Brauner, R.: Effects of 20-100  
890 nanometre particles on liquid clouds in the clean summertime Arctic, *Atmos. Chem. Phys.*, 16,  
891 11107-11124, doi:10.5194/acp-16-11107-2016, 2016.

892 Leck, C. and Bigg, E. K.: Aerosol production over remote marine areas-A new route, *Geophys.*  
893 *Res. Lett.*, 26(23), 3577, doi:10.1029/1999GL010807, 1999.

894 Leck, C. and Bigg, E. K.: Source and evolution of the marine aerosol - A new perspective,  
895 *Geophys. Res. Lett.*, 32(19), 1–4, doi:10.1029/2005GL023651, 2005.

896 Leck, C. and Bigg, E. K.: New Particle Formation of Marine Biological Origin, *Aerosol Sci.*  
897 *Technol.*, 44(7), 570–577, doi:10.1080/02786826.2010.481222, 2010.

898 Lohmann, U. and Feichter, J.: Global indirect aerosol effects: a review, *Atmos. Chem. Phys.*, 5,  
899 715–735, doi:10.5194/acp-5-715-2005, 2005.

900 Mauldin, R. L., Madronich, S., Flocke, S. J., Eisele, F. L., Frost, G. J. and Prevot, A. S. H. :  
901 New insights on OH: Measurements around and in clouds, *Geophys. Res. Lett.*, 24(No 23),  
902 3033-3036, doi:10.1029/97GL02983, 1997.

903 Mauritsen, T., Sedlar, J., Tjernström, M., Leck, C., Martin, M., Shupe, M., Sjogren, S., Sierau,  
904 B., Persson, P. O. G., Brooks, I. M. and Swietlicki, E.: An Arctic CCN-limited cloud-aerosol  
905 regime, *Atmos. Chem. Phys.*, 11(1), 165–173, doi:10.5194/acp-11-165-2011, 2011.

906 Mungall, E. L., Croft, B., Lizotte, M., Thomas, J. L., Murphy, J. G., Levasseur, M., Martin, R.  
907 V., Wentzell, J. J. B., Liggio, J. and Abbatt, J. P. D.: Dimethyl sulfide in the summertime Arctic

908 atmosphere: measurements and source sensitivity simulations, *Atmos. Chem. Phys.*, 16(11),  
909 6665–6680, doi:10.5194/acp-16-6665-2016, 2016.

910 Nguyen, Q. T., Glasius, M., Sørensen, L. L., Jensen, B., Skov, H., Birmili, W., Wiedensohler, A.,  
911 Kristensson, A., Nøjgaard, J. K. and Massling, A.: Seasonal variation of atmospheric particle  
912 number concentrations, new particle formation and atmospheric oxidation capacity at the high  
913 Arctic site Villum Research Station, Station Nord, *Atmos. Chem. Phys. Discuss.*, 1–41,  
914 doi:10.5194/acp-2016-205, 2016.

915 Petters, M. D. and Kreidenweis, S. M.: A single parameter representation of hygroscopic growth  
916 and cloud condensation nucleus activity, *Atmos. Chem. Phys.*, 7, 1961–1971, 2007.

917 Pierce, J. R., Leaitch, W. R., Liggio, J., Westervelt, D. M., Wainwright, C. D., Abbatt, J. P. D.,  
918 Ahlm, L., Al-Basheer, W., Cziczo, D. J., Hayden, K. L., Lee, A. K. Y., Li, S.-M., Russell, L. M.,  
919 Sjostedt, S. J., Strawbridge, K. B., Travis, M., Vlasenko, A., Wentzell, J. J. B., Wiebe, H. A.,  
920 Wong, J. P. S., and Macdonald, A. M.: Nucleation and condensational growth to CCN sizes  
921 during a sustained pristine biogenic SOA event in a forested mountain valley, *Atmos. Chem.*  
922 *Phys.*, 12, 3147-3163, doi:10.5194/acp-12-3147-2012, 2012.

923 Pirjola, L., O’Dowd, C. D., Brooks, I. M. and Kulmala, M.: Can new particle formation occur in  
924 the clean marine boundary layer?, *J. Geophys. Res. Atmos.*, 105(D21), 26531–26546,  
925 doi:10.1029/2000JD900310, 2000.

926 Quinn, P. K. and Bates, T. S.: The case against climate regulation via oceanic phytoplankton  
927 sulphur emissions, *Nature*, 480(7375), 51–56, doi:10.1038/nature10580, 2011.

928 Quinn, P. K., Shaw, G., Andrews, E., Dutton, E. G., Ruoho-Airola, T. and Gong, S. L.: Arctic  
929 haze: Current trends and knowledge gaps, *Tellus, Ser. B Chem. Phys. Meteorol.*, 59(1), 99–114,  
930 doi:10.1111/j.1600-0889.2006.00238.x, 2007.

931 Radke, F. L. and Hobbs, P. V.: Humidity and particle fields around some small cumulus clouds,  
932 *Journal of atmospheric sciences*, 48(9), 1190-1193, doi: [http://dx.doi.org/10.1175/1520-](http://dx.doi.org/10.1175/1520-0469(1991)048<1190:HAPFAS>2.0.CO;2)  
933 [0469\(1991\)048<1190:HAPFAS>2.0.CO;2](http://dx.doi.org/10.1175/1520-0469(1991)048<1190:HAPFAS>2.0.CO;2), 1991.

934 Rahn, K. A., Borys, R. D. and Shaw, G. E.: The Asian source of Arctic haze bands, *Nature*, 268,  
935 713-715, doi: 10.1038/268713a0, 1977.

936 Rehbein, P. J. G., Jeong, C. H., McGuire, M. L., Yao, X., Corbin, J. C. and Evans, G. J.: Cloud  
937 and fog processing enhanced gas-to-particle partitioning of trimethylamine, *Environ. Sci.*  
938 *Technol.*, 45(10), 4346–4352, doi:10.1021/es1042113, 2011.

939 Riipinen, I., Pierce, J. R., Yli-Juuti, T., Nieminen, T., Häkkinen, S., Ehn, M., Junninen, H.,  
940 Lehtipalo, K., Petäjä, T., Slowik, J., Chang, R., Shantz, N. C., Abbatt, J., Leaitch, W. R.,  
941 Kerminen, V.-M., Worsnop, D. R., Pandis, S. N., Donahue, N. M., and Kulmala, M.: Organic  
942 condensation: a vital link connecting aerosol formation to cloud condensation nuclei (CCN)  
943 concentrations, *Atmos. Chem. Phys.*, 11, 3865-3878, doi:10.5194/acp-11-3865-2011, 2011.

944 Seinfeld, J.H., and Pandis, S. N.: *Atmospheric Chemistry and Physics: From Air Pollution to*  
945 *Climate Change*. 3rd Edition. John Wiley & Sons, Inc., 2016.

946 Shaw, G.E. and Stamnes, K.: Arctic haze: perturbations of the polar radiation budget. *Ann. N. E*

947 Ad. Aci. 338, 533-539, doi: 10.1111/j.1749-6632.1980.tb17145.x 1980.  
948

949 Shaw, G. E.: The Arctic Haze Phenomenon, *Bull. Am. Meteorol. Soc.*, 76, 2403–2413,  
950 doi:10.1175/1520-0477(1995)076<2403:TAHP>2.0.CO;2, 1995.

951 Skamarock, W. C., Klemp, J. B., Dudhia, J., Gill, D. O., Barker, D. M., Wang, W. and Powers, J.  
952 G.: A Description of the Advanced Research WRF Version 2, [online] Available from:  
953 <http://oai.dtic.mil/oai/oai?verb=getRecord&metadataPrefix=html&identifier=ADA487419>  
954 (Accessed 22 March 2016), 2005.

955 Sjostedt, S. J., Leaitch, W. R., Levasseur, M., Scarratt, M., Michaud, S., Motard-Côté, J.,  
956 Burkhardt, J. H., and Abbatt J.: Evidence for the uptake of atmospheric acetone and methanol by  
957 the Arctic Ocean during late summer DMS-Emission plumes. *J. Geophys. Res.*, 117, D12303,  
958 doi: 10.1029/2011JD017086, 2012.

959 Stohl, a., Forster, C., Frank, A., Seibert, P. and Wotawa, G.: Technical note: The Lagrangian  
960 particle dispersion model FLEXPART version 6.2, *Atmos. Chem. Phys. Discuss.*, 5(4), 4739–  
961 4799, doi:10.5194/acpd-5-4739-2005, 2005.

962 Ström, J., Umegård, J., Tørseth, K., Tunved, P., Hansson, H. C., Holmén, K., Wismann, V.,  
963 Herber, A. and König-Langlo, G.: One year of particle size distribution and aerosol chemical  
964 composition measurements at the Zeppelin Station, Svalbard, March 2000-March 2001, *Phys.*  
965 *Chem. Earth*, 28(March 2000), 1181–1190, doi:10.1016/j.pce.2003.08.058, 2003.

966 Ström, J., Engvall, A. C., Delbart, F., Krejci, R. and Treffeisen, R.: On small particles in the  
967 Arctic summer boundary layer: Observations at two different heights near Ny-Ålesund,  
968 Svalbard, *Tellus, Ser. B Chem. Phys. Meteorol.*, 61 B(2), 473–482, doi:10.1111/j.1600-  
969 0889.2008.00412.x, 2009.

970 Tjernström, M., Birch, C. E., Brooks, I. M., Shupe, M. D., Persson, P. O. G., Sedlar, J.,  
971 Mauritsen, T., Leck, C., Paatero, J., Szczodrak, M. and Wheeler, C. R.: Meteorological  
972 conditions in the central Arctic summer during the Arctic Summer Cloud Ocean Study  
973 (ASCOS), *Atmos. Chem. Phys.*, 12(15), 6863–6889, doi:10.5194/acp-12-6863-2012, 2012.

974 Tjernström, M., Leck, C., Birch, C. E., Bottenheim, J. W., Brooks, B. J., Brooks, I. M., Bäcklin,  
975 L., Chang, R. Y. W., De Leeuw, G., Di Liberto, L., De La Rosa, S., Granath, E., Graus, M.,  
976 Hansel, a., Heintzenberg, J., Held, a., Hind, a., Johnston, P., Knulst, J., Martin, M., Matrai, P.  
977 a., Mauritsen, T., Müller, M., Norris, S. J., Orellana, M. V., Orsini, D. a., Paatero, J., Persson, P.  
978 O. G., Gao, Q., Rauschenberg, C., Ristovski, Z., Sedlar, J., Shupe, M. D., Sierau, B., Sirevaag,  
979 a., Sjogren, S., Stetzer, O., Swietlicki, E., Szczodrak, M., Vaattovaara, P., Wahlberg, N.,  
980 Westberg, M. and Wheeler, C. R.: The Arctic Summer Cloud Ocean Study (ASCOS): Overview  
981 and experimental design, *Atmos. Chem. Phys.*, 14(6), 2823–2869, doi:10.5194/acp-14-2823-  
982 2014, 2014.

983 Tunved, P., Ström, J. and Krejci, R.: Arctic aerosol life cycle: linking aerosol size distributions  
984 observed between 2000 and 2010 with air mass transport and precipitation at Zeppelin station,  
985 Ny-Ålesund, Svalbard, *Atmos. Chem. Phys.*, 13(7), 3643–3660, doi:10.5194/acp-13-3643-2013,  
986 2013.

- 987 Twomey, S.: Pollution and the Planetary Albedo, *Atmos. Environ.*, 41(Vol. 8), 1251–1256,  
988 doi:10.1016/j.atmosenv.2007.10.062, 1974.
- 989 Wang, M. and Overland, J. E.: A sea ice free summer Arctic within 30 years: An update from  
990 CMIP5 models, *Geophys. Res. Lett.*, 39(17), 2–6, doi:10.1029/2012GL052868, 2012.
- 991 Weber, R. J., McMurry, P. H., Mauldin, L., Tanner, D. J., Eisele, F. L., Brechtel, F. J.,  
992 Kreidenweis, S. M., Kok, G. L., Schillawski, R. D. and Baumgardner, D.: A study of new  
993 particle formation and growth involving biogenic and trace gas species measured during ACE 1,  
994 *J. Geophys. Res.*, 103(D13), 16385–16396, doi:10.1029/97JD02465, 1998.
- 995 Wentworth, G. R., Murphy, J. G., Croft, B., Martin, R. V., Pierce, J. R., Côté, J.-S., Courchesne,  
996 I., Tremblay, J.-É., Gagnon, J., Thomas, J. L., Sharma, S., Toom-Saunty, D., Chivulescu, a.,  
997 Levasseur, M. and Abbatt, J. P. D.: Ammonia in the summertime Arctic marine boundary layer:  
998 sources, sinks and implications, *Atmos. Chem. Phys.*, 16, 1937-1953, doi:10.5194/acp-16-1937-  
999 2016, 2016.
- 1000 Wiedensohler, A., Covert, D. S., Swietlicki, E., Aalto, P., Heintzenberg, J. and Leck, C.:  
1001 Occurrence of an ultrafine particle mode less than 20 nm in diameter in the marine boundary  
1002 layer during Arctic summer and autumn, *Tellus, Ser. B Chem. Phys. Meteorol.*, 48(2), 213–222,  
1003 doi:10.1034/j.1600-0889.1996.t01-1-00006.x, 1996.
- 1004 Wiedensohler, A. H.-C. Hansson, D. Orsini, M. Wendisch, F. Wagner, K.N. Bower, T.W.  
1005 Chourolarton, M. Wells, M. Parkin, K. Acker, W. Wiprecht, M.C. Facchini, J.A. Lind, S. Fuzzi,  
1006 B.G. Arends, M. Kulmalao: Night-time formation and occurrence of new particles associated  
1007 with orographic clouds, *Atmos. Env.*, 31(16), 2445-2559, doi: [http://dx.doi.org/10.1016/S1352-  
1008 2310\(96\)00299-3](http://dx.doi.org/10.1016/S1352-2310(96)00299-3), 1997.
- 1009 Willis, M. D., Burkart, J., Thomas, J. L., Köllner, F., Schneider, J., Bozem, H., Hoor, P. M.,  
1010 Aliabadi, A. A., Schulz, H., Herber, A. B., Leaitch, W. R. and Abbatt, J. P. D.: Growth of  
1011 nucleation mode particles in the summertime Arctic: a case study, *Atmos. Chem. Phys.*, 7663–  
1012 7679, doi:10.5194/acp-16-7663-2016, 2016.
- 1013 Zhang, J., Spitz, Y. H., Steele, M., Ashjian, C., Campbell, R., Berline, L. and Matrai, P.:  
1014 Modeling the impact of declining sea ice on the Arctic marine planktonic ecosystem, *J. Geophys.*  
1015 *Res. Ocean.*, 115(10), 1–24, doi:10.1029/2009JC005387, 2010.
- 1016
- 1017

1017  
1018

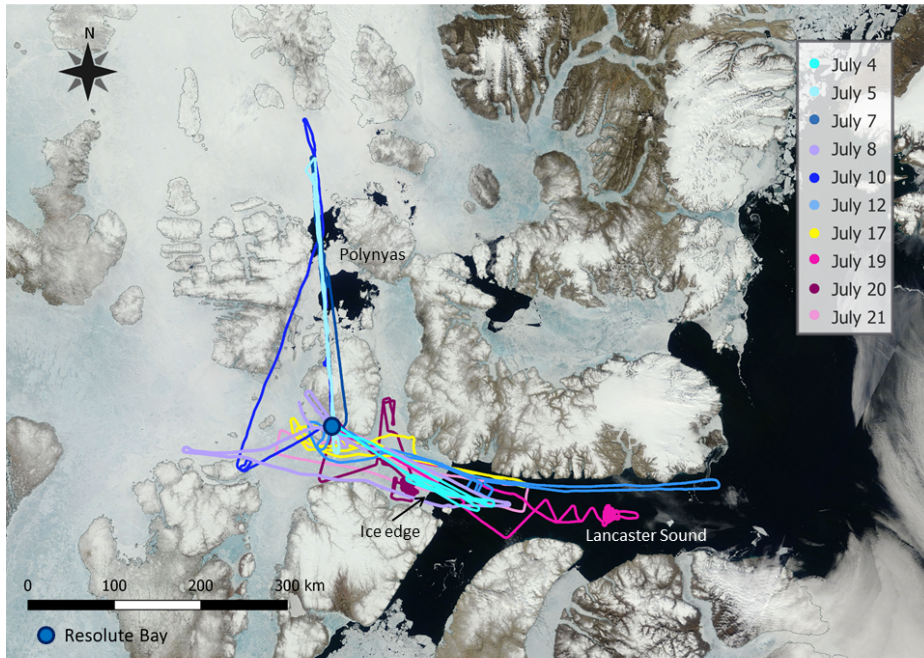

1019  
1020  
1021  
1022

Figure 1. Compilation of all flight tracks plotted on a satellite image from July 4, 2014. The image is taken from: <https://earthdata.nasa.gov/labs/worldview>.

1022

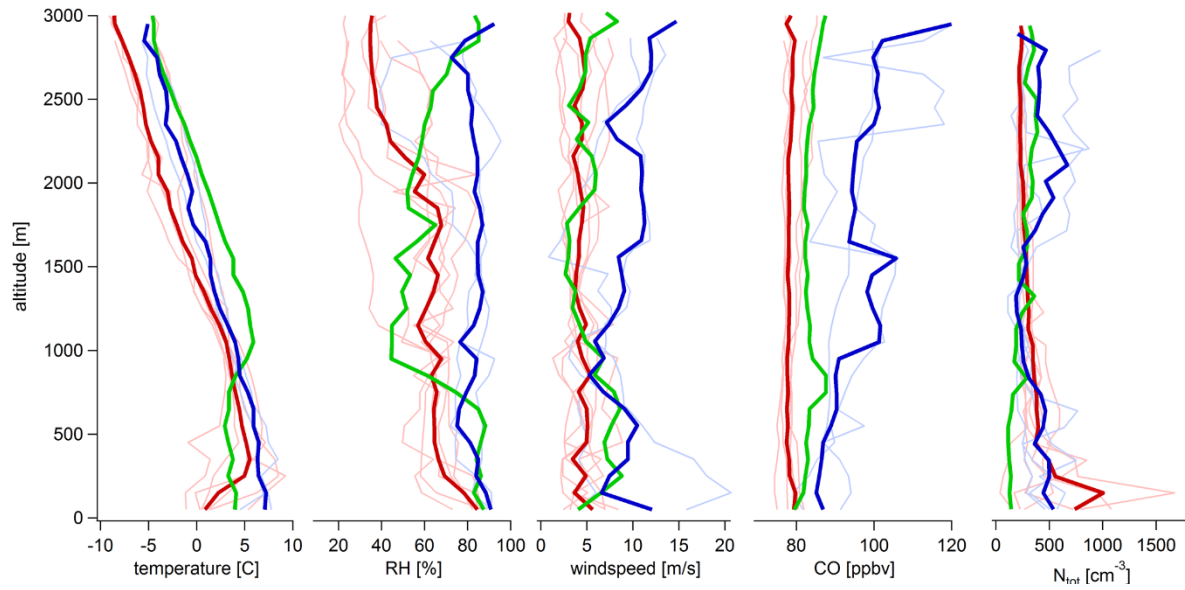

1023

1024 Figure 2. Median temperature, relative humidity (RH), wind speed, CO mixing ratio and N<sub>tot</sub>  
1025 profiles for the Arctic air mass period (dark red), the transition day (dark green), and the southern  
1026 air mass period (dark blue). Median profiles for each flight are plotted in the background in the  
1027 corresponding light colours.

1028

1029

1030

1031

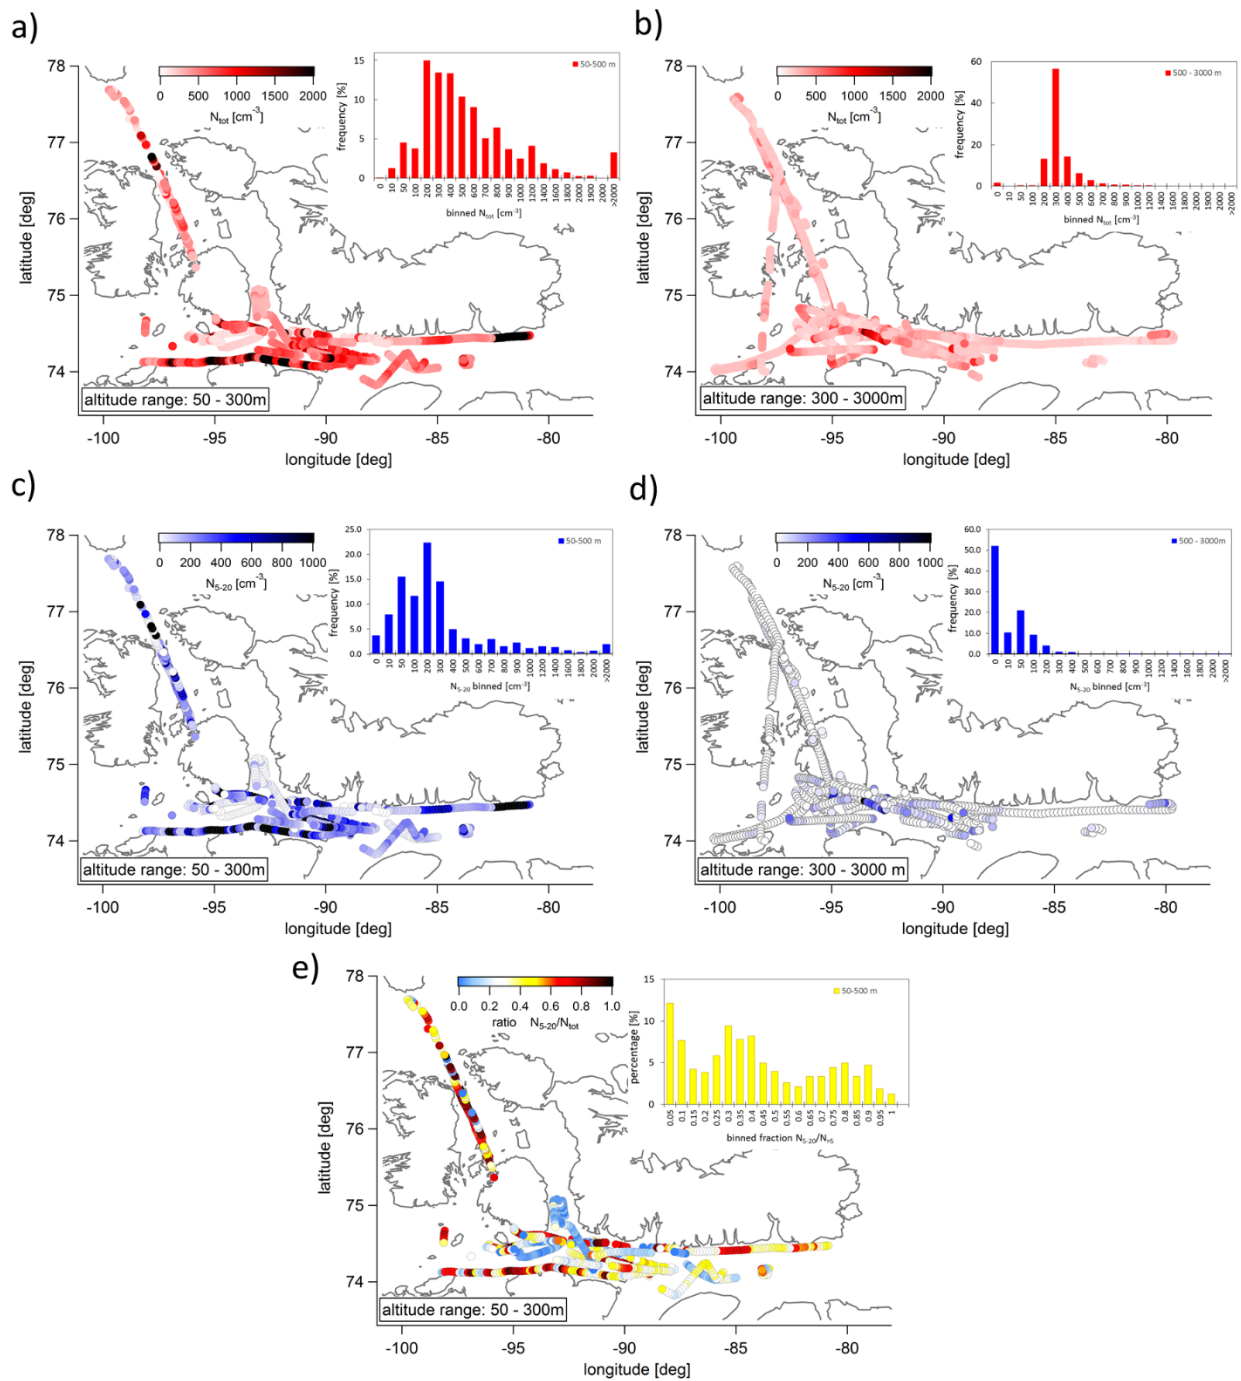

1031  
 1032 Figure 3. Flight tracks colour coded by particle concentrations. a.) Flight tracks within the  
 1033 boundary layer (50-300 m) colour coded by  $N_{tot}$ . b) Flight tracks within the free troposphere  
 1034 (300-3000 m) colour coded by  $N_{tot}$ . c) Flight tracks within the boundary layer (50-300m)  
 1035 colour coded by UFP. d) Flight tracks within the free troposphere (300-3000 m) colour coded by  $N_{5-20}$ .  
 1036 e) Flight tracks within the boundary layer (50-300 m) colour coded by the ratio of  $N_{5-20}/N_{tot}$   
 1037



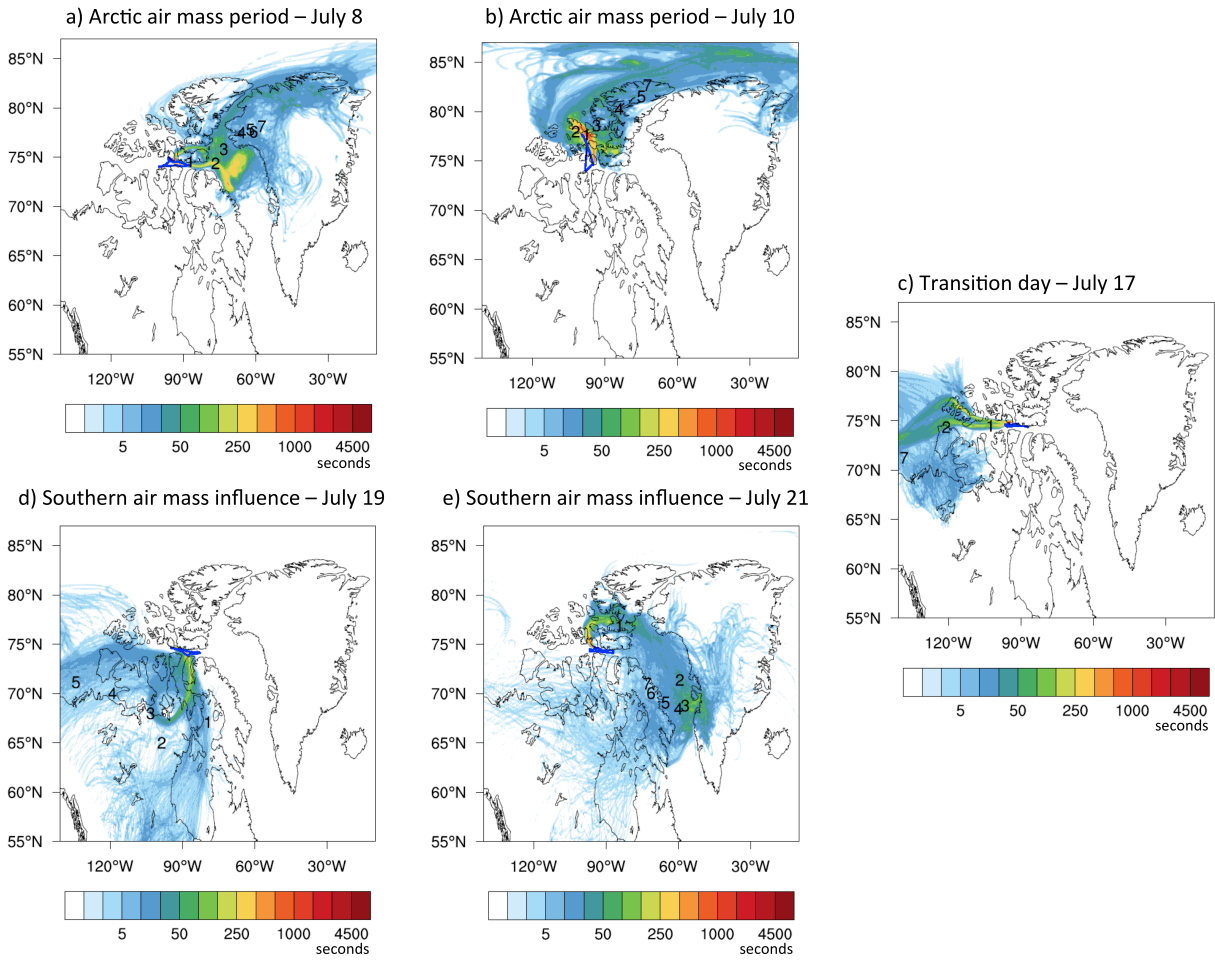

1038

1039 Figure 4. FLEXPART-WRF potential emissions sensitivities for each flight (using particle  
 1040 releases every 2 minutes along the flight track) that illustrate transport regimes during different  
 1041 periods of the campaign. The colour code indicates the residence time of air in seconds and the  
 1042 numbers represent the position of the plume centroid location in days prior to release (days 1-7).  
 1043

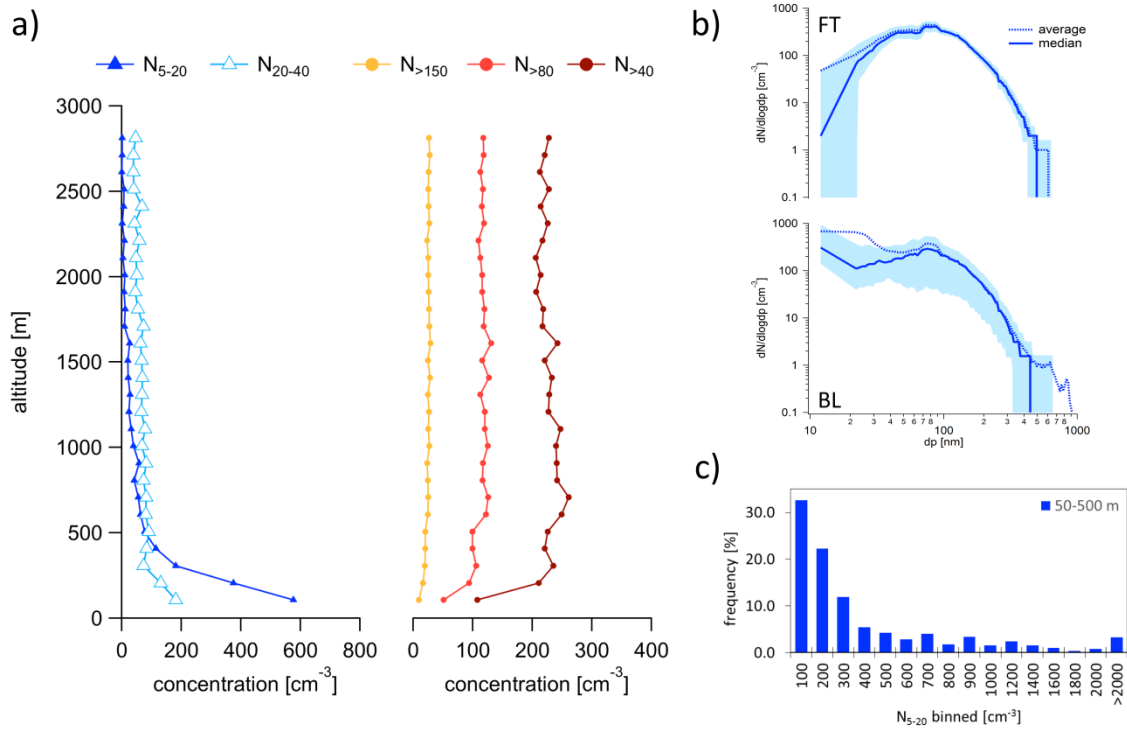

1044

1045 Figure 5. Average particle concentration data during the Arctic air mass period. a) Average  
 1046 vertical profiles of  $N_{5-20}$ ,  $N_{20-40}$ ,  $N_{>40}$ ,  $N_{>80}$ , and  $N_{>150}$ . b) Average (solid line) and median  
 1047 (dashed line) size distribution within the BL and the FT. The light blue area represents the 25-  
 1048 75<sup>th</sup> % percentile range. c) Frequency distribution of the occurrence of UFP illustrates the large  
 1049 variability of the UFP concentrations within the BL.  
 1050

1050 Revised figure

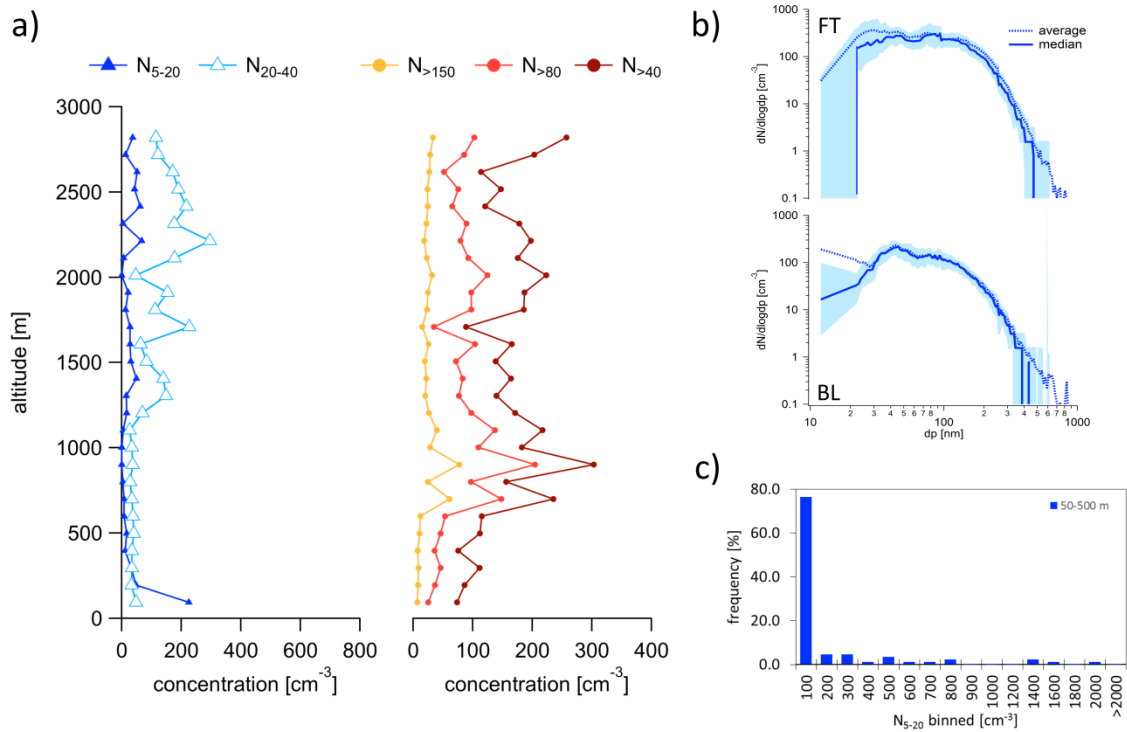

1051

1052 Figure 6. Average particle concentration data on the transition day. a) Average vertical profiles  
1053 of N<sub>5-20</sub>, N<sub>20-40</sub>, N<sub>>40</sub>, N<sub>>80</sub>, and N<sub>>150</sub>. b) Average (solid line) and median (dashed line) size  
1054 distribution within the BL and the FT. The light blue area represents the 25-75<sup>th</sup> % percentile  
1055 range. c) Frequency distribution of the occurrence of UFP illustrates the large variability of the  
1056 UFP concentrations within the BL.  
1057

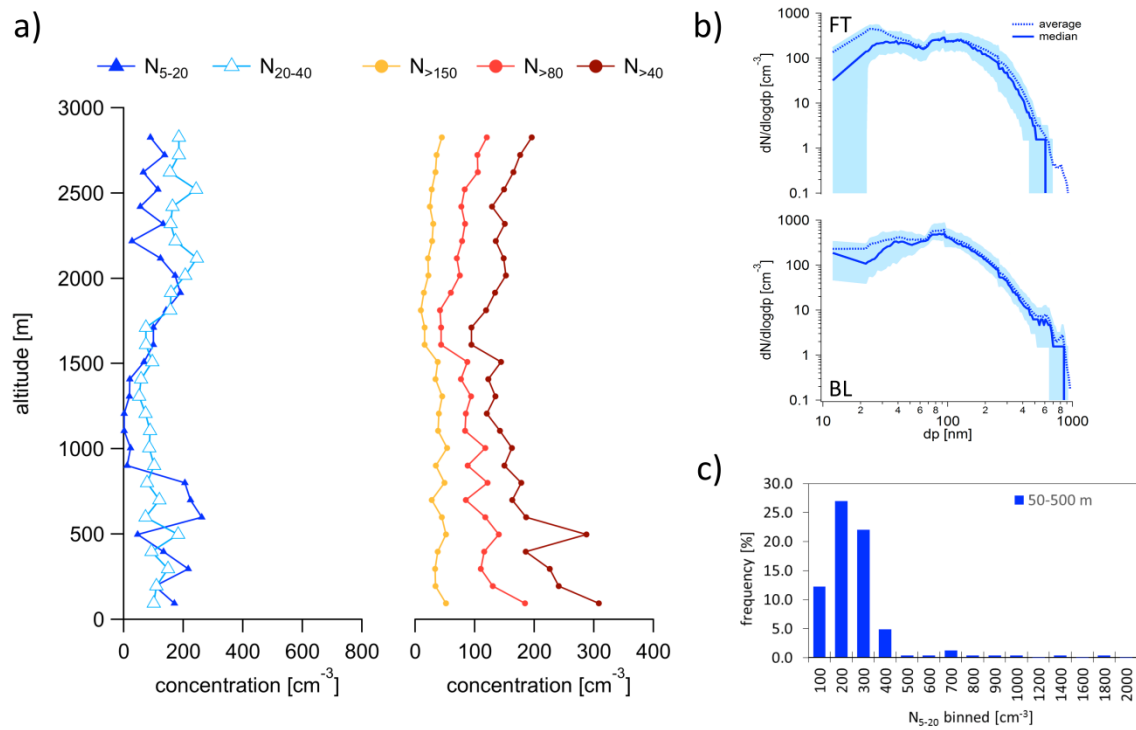

1058

1059 Figure 7. Average particle concentration data during the southern air mass period. a) Average  
 1060 vertical profiles of  $N_{5-20}$ ,  $N_{20-40}$ ,  $N_{>40}$ ,  $N_{>80}$ , and  $N_{>150}$ . b) Average (solid line) and median  
 1061 (dashed line) size distribution within the BL and the FT. The light blue area represents the 25-  
 1062 75<sup>th</sup> % percentile range. c) Frequency distribution of the occurrence of UFP illustrates the large  
 1063 variability of the UFP concentrations within the BL.  
 1064

1064 Revised figure

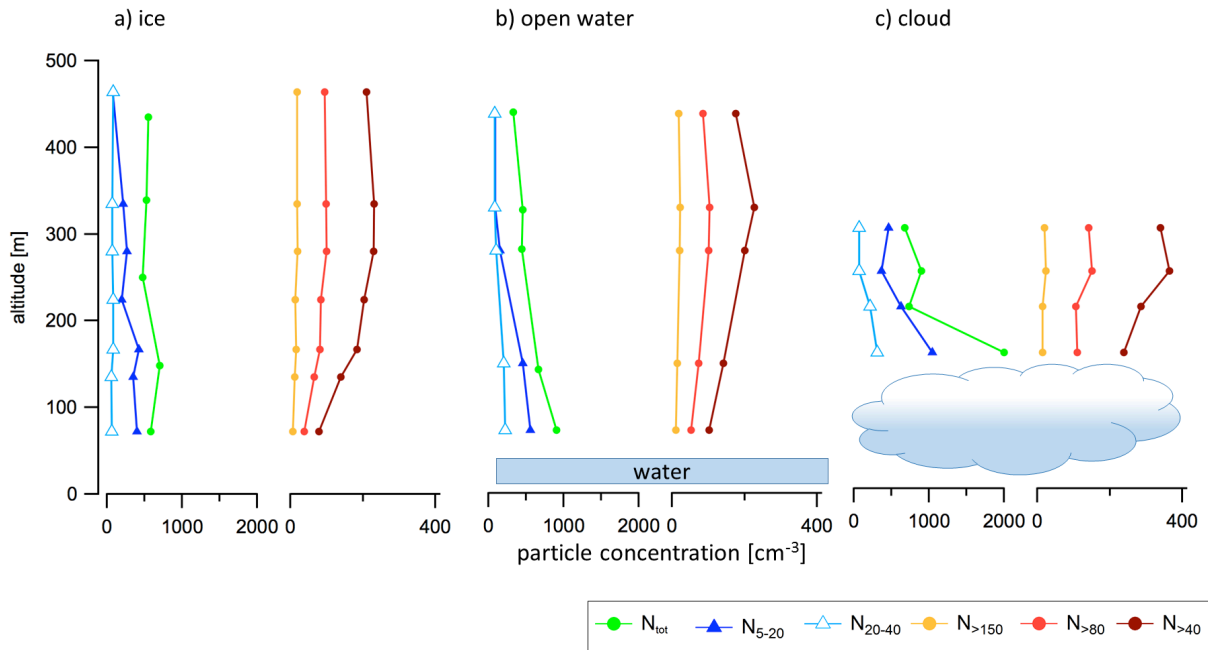

1065

1066 Figure 8. Average profiles of particle concentrations above ice, open water and cloud. The  
1067 number of data points for each specific profile is: 130 above water, 216 above cloud, and 123  
1068 above water.

1069

1070

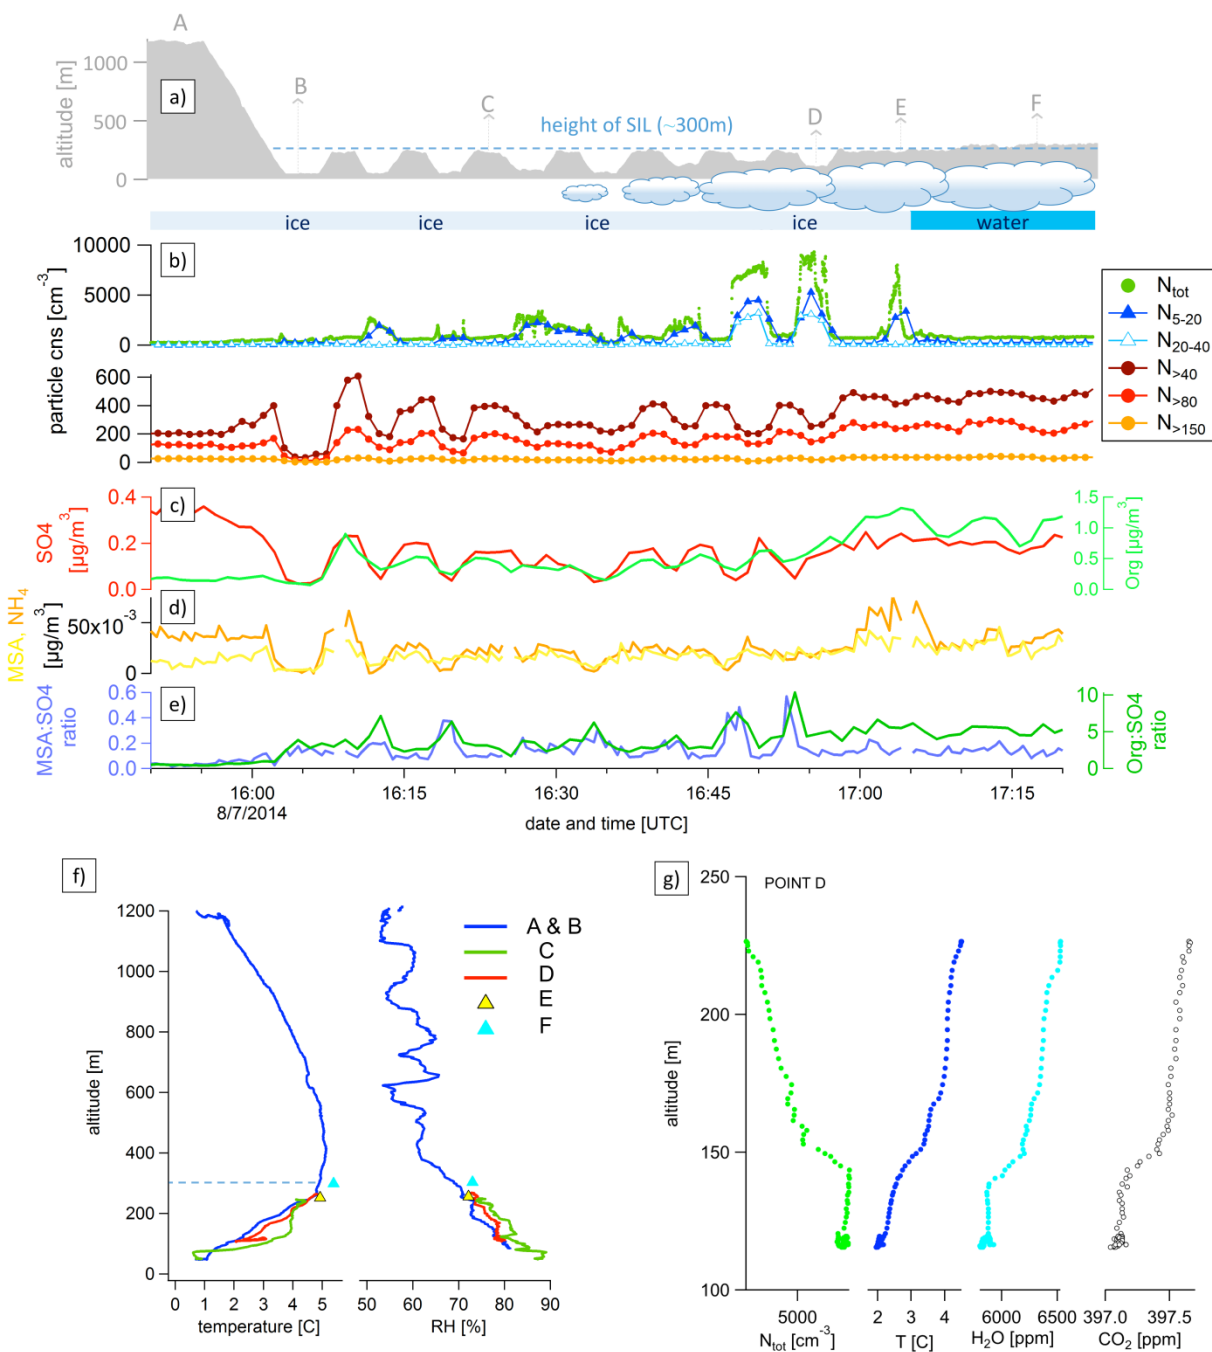

1071  
 1072  
 1073  
 1074  
 1075  
 1076

Figure 9. Case study from July 8 flight. Time series of flight altitude and illustration of the surface including cloud coverage (a), aerosol size (b) and chemical composition (c-e). (f) Vertical profiles of temperature and RH at locations A-F. (g) N<sub>tot</sub>, temperature, H<sub>2</sub>O mixing ratio and CO<sub>2</sub> profiles at location D.

1077

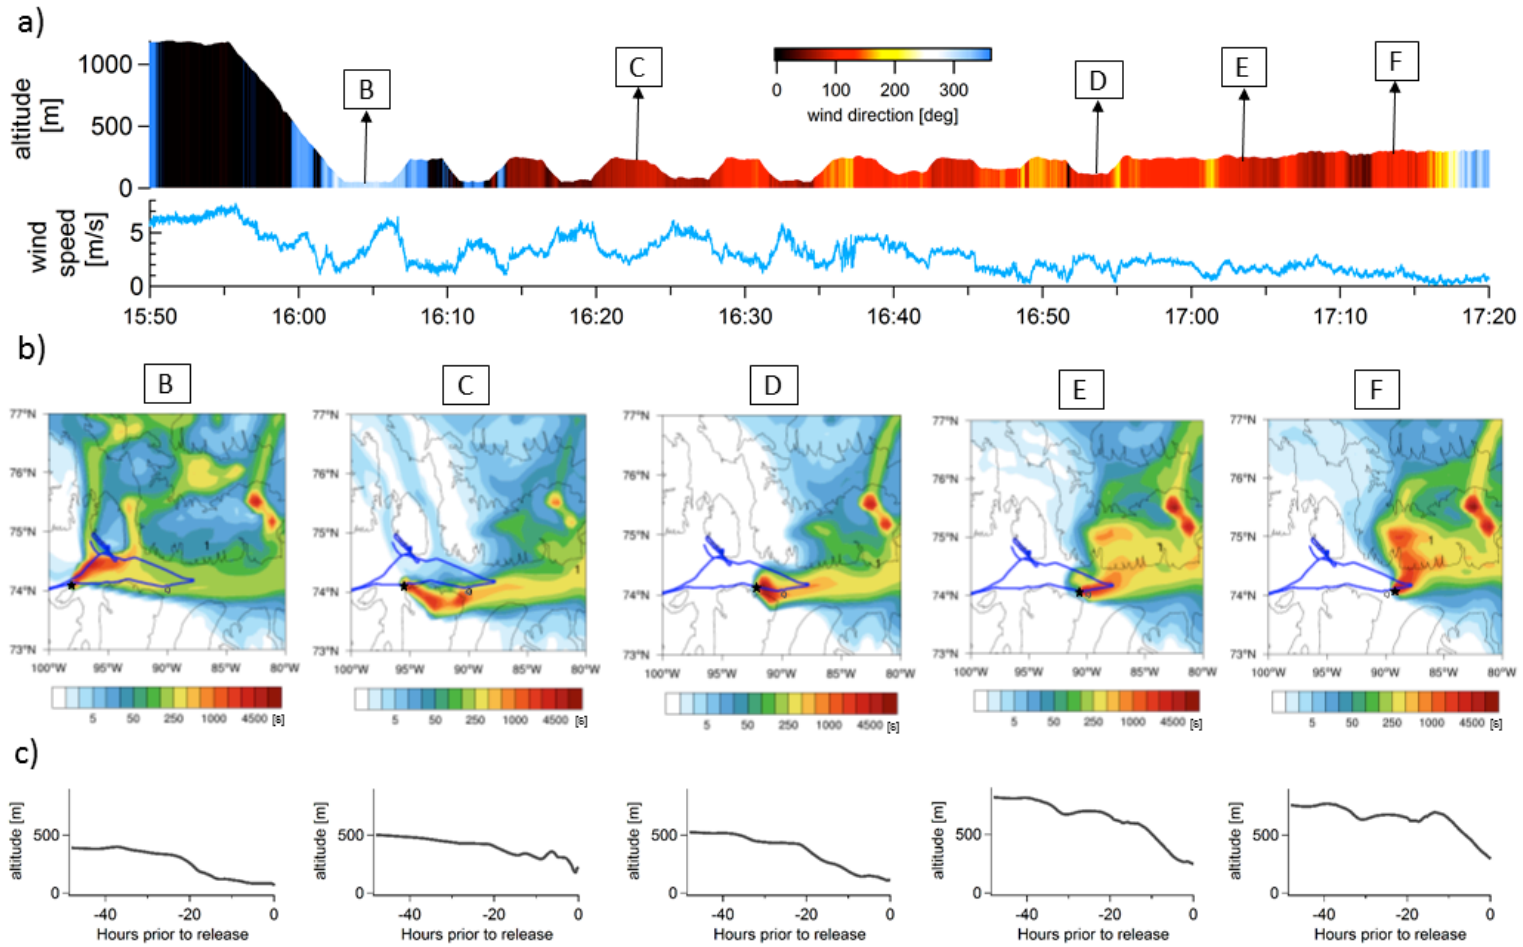

1078  
1079  
1080  
1081

Figure 10. (a) Time series of aircraft altitude color coded with the wind direction and time series of wind speed (b) FLEXPART-WRF seven day backwards potential emissions sensitivities for points along the flight track (60 second release at time at indicated time and

1082 location) showing the air mass history at 5 representative locations within the SIL. The plume centroid location for particles with age  
1083 of one day is indicated. (c) The bottom plots show the altitude of plume centroid 48 hours back in time.



1084  
1085  
1086

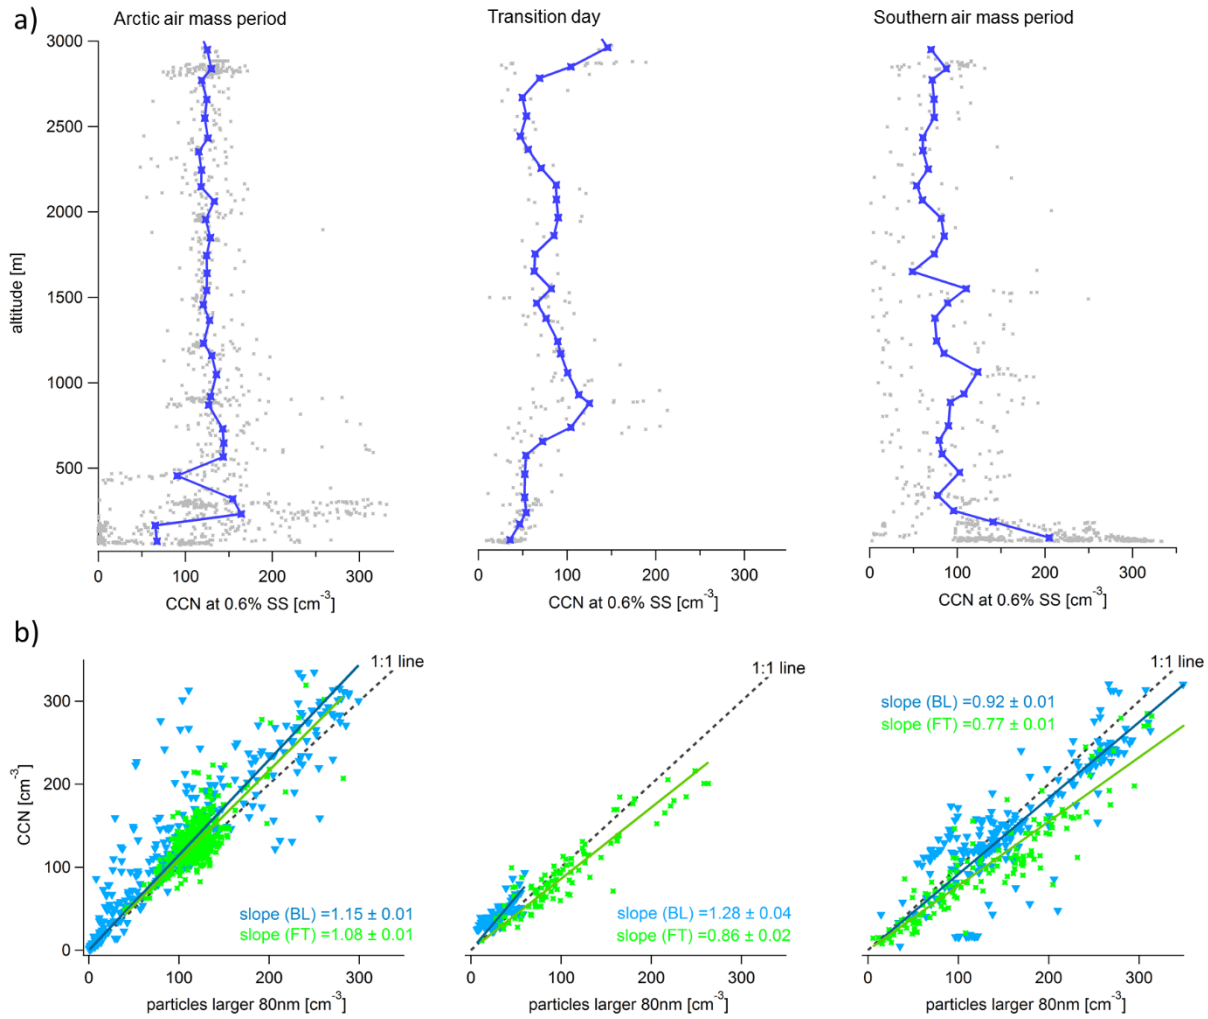

1087  
1088  
1089  
1090  
1091  
1092  
1093

Figure 11. (a) Vertical profiles of average CCN concentrations (dark blue). All data points are plotted in light grey. (b) Correlation plots between CCN concentrations and particles larger than 80nm.

1093 added figure

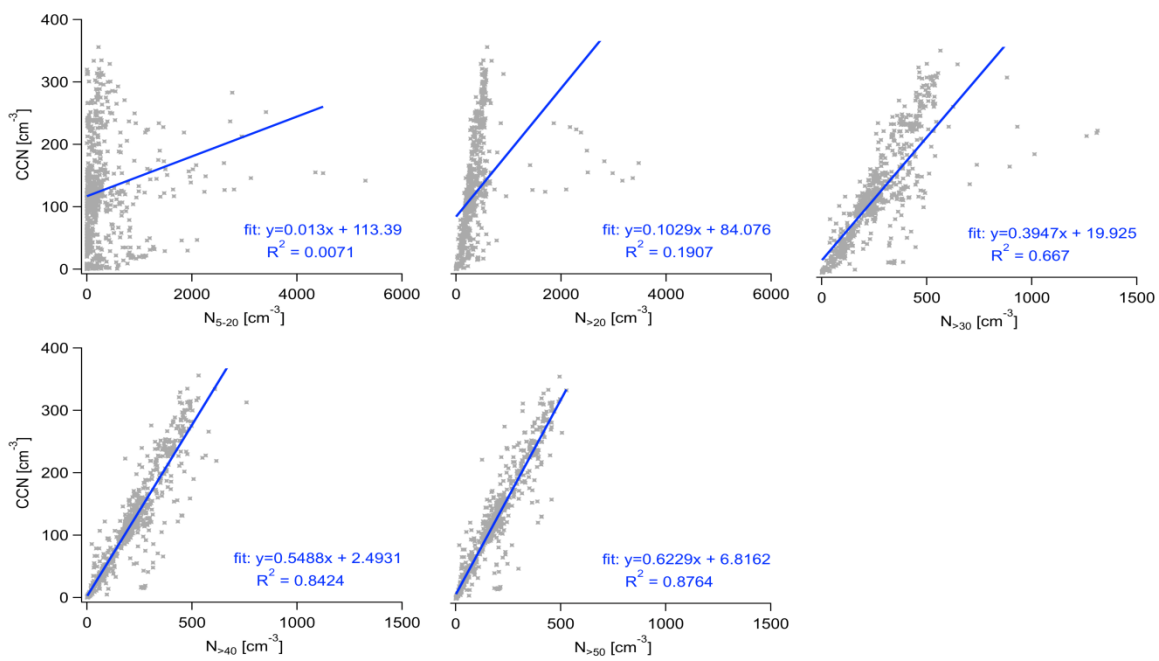

1094  
1095  
1096  
1097  
1098  
1099

Figure 12. Correlations between CCN and particle concentrations for the full study period.

1099  
1100

1101 **Supplemental Material**

1102

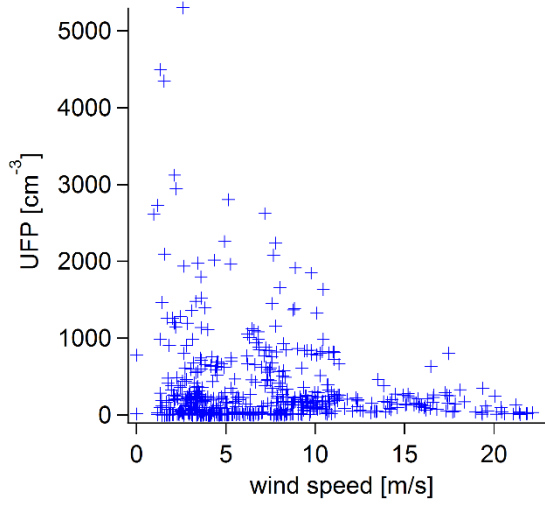

1103  
1104  
1105  
1106

S Figure 1. UFP vs wind speed within the BL for the entire campaign.

1106  
1107  
1108  
1109

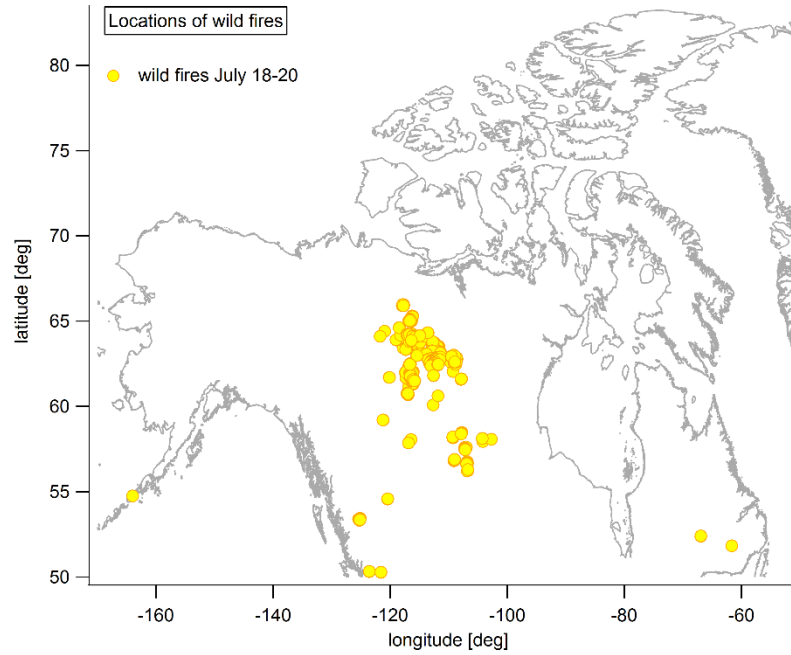

1110  
1111  
1112  
1113  
1114  
1115  
1116

S Figure 2. Location of wild fires relevant to the southern air mass period. The data is obtained from the NASA databank (MODIS Active Fire Detections extracted from [MCD14ML](https://earthdata.nasa.gov/active-fire-data) distributed by NASA FIRMS, available online: <https://earthdata.nasa.gov/active-fire-data>).

1116  
1117

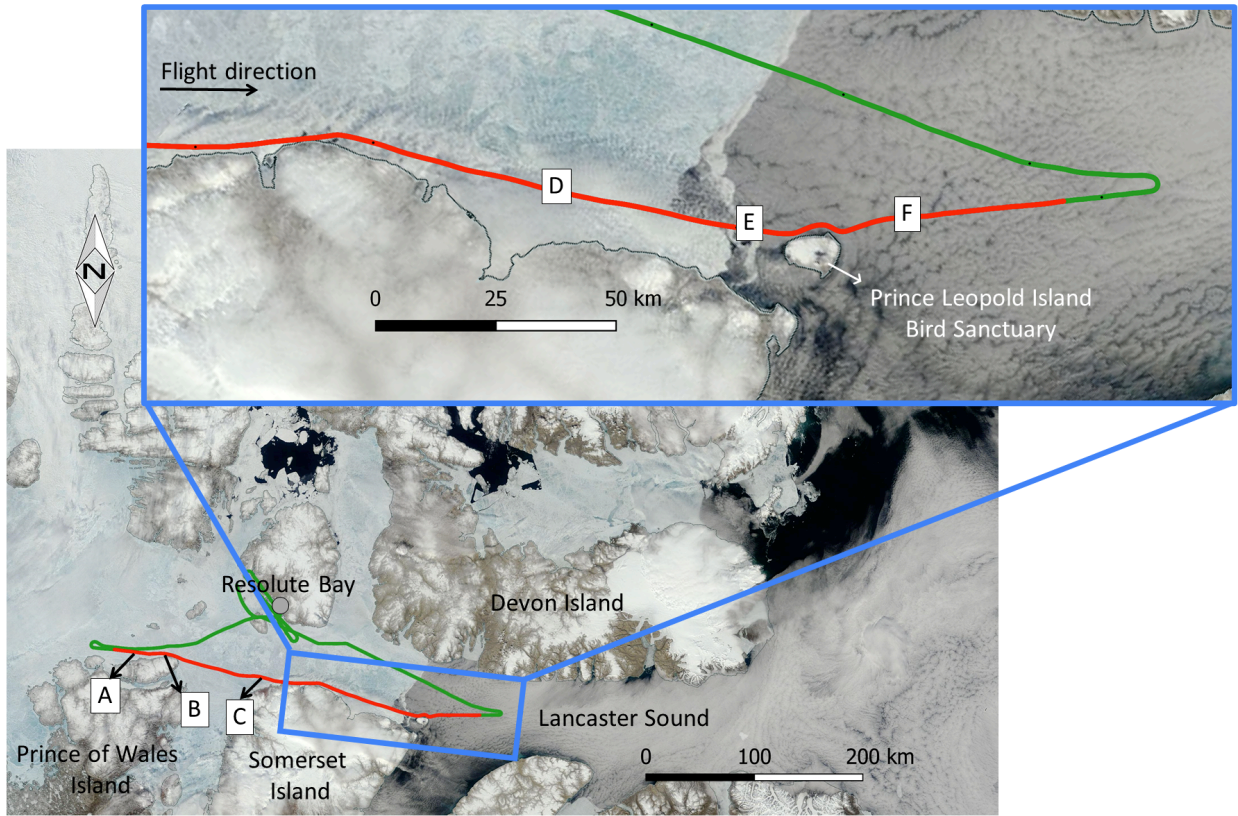

1118  
1119  
1120  
1121  
1122  
1123  
1124  
1125  
1126  
1127  
1128  
1129  
1130  
1131

S Figure 3. Flight track of the case study on July 8. The flight track highlighted in red corresponds to the part of the flight discussed in the case study. The five locations (B)-(F) are located within the BL and air mass histories are discussed in detail. At location (A) the aircraft was still above the BL. The enlarged area shows the section where cloud patches started to reach the ice (also visible on the satellite picture) and the locations where highest concentrations of UFP were observed: (D) in cloud vicinity and (E) around the ice edge.

1131

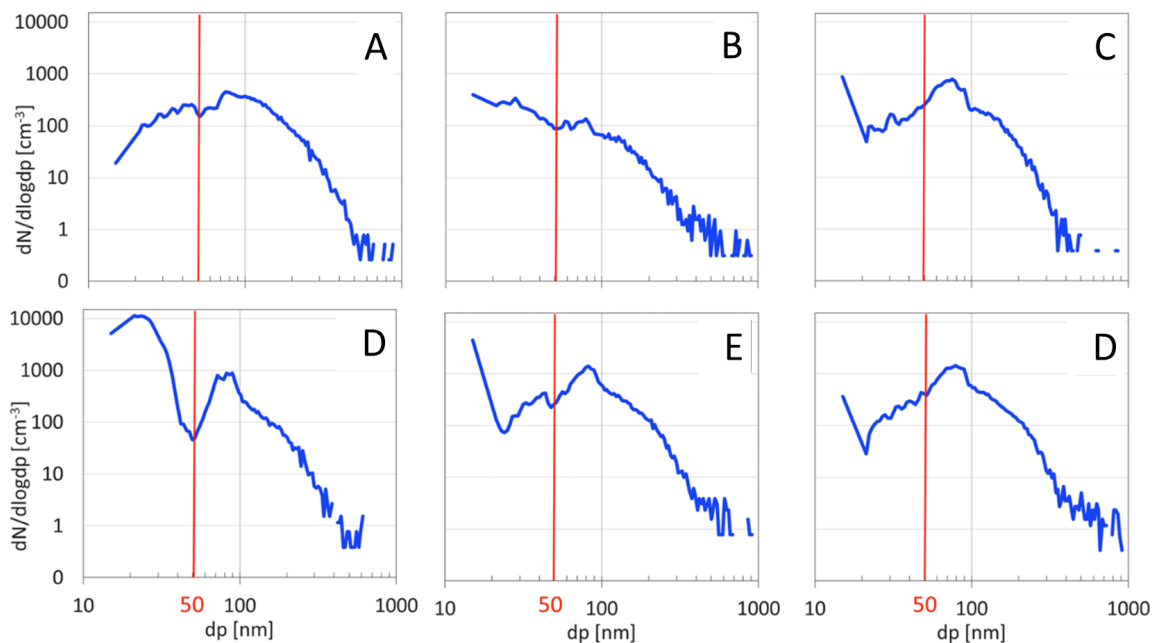

1132  
1133  
1134  
1135  
1136  
1137

S Figure 4. Size distributions at locations i-vi. Above the BL a mode of UFP is missing (A). The most pronounced mode of UFP was observed above cloud (D). At this time increased particle concentrations extend almost up to 50nm suggesting particle nucleation with subsequent growth.

1137  
1138  
1139  
1140  
1141  
1142  
1143  
1144  
1145

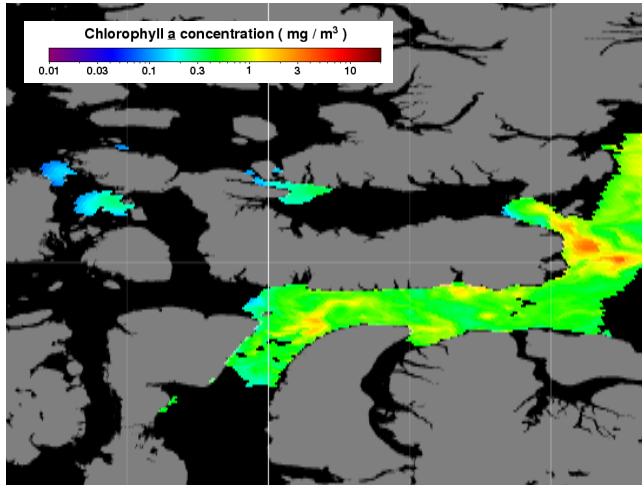

1146 S Figure 5: Chlorophyll a concentrations on July 5<sup>th</sup> 2014 estimated from satellite measurements  
1147 (Visible and Infrared Imager/Radiometer Suite) by NASA  
1148 (<http://oceancolor.gsfc.nasa.gov/cgi/13>).

1149  
1150  
1151  
1152  
1153
